# Supplementary material
Source: publisher figshare collection journal article supplement (https://gsapubs.figshare.com/ndownloader/files/23030855)
Supplement: Supplementary file 1 [file 23030855]

## Sheet: Table S2
TABLE S2: LA-ICPMS analyses of black shale fine matrix.
Sample No.	Age Ma	P 31 ppm	V ppm	Cr ppm	Fe ppm	W ppm	U ppm
CB1	0.01	447.536	338.88	168.56	46353.3	1.39754	13.39
CB1	0.01	377.865	326.53	159.95	59469.5	1.40171	11.7
CB1	0.01	401.404	347.31	165.22	59776.9	1.40647	8.65
CB1	0.01	476.477	190.68	116.47	31484.9	0.632418	37.26
CB1	0.01	529.141	310.38	146.73	44427.4	1.27349	17.98
CB5A	0.01	865.972	391.57	154.01	51967.5	1.49656	15.19
CB5A	0.01	647.375	441.47	180.54	43840	1.38877	14.43
CB5A	0.01	596.586	351.77	146.48	44291	1.123	14.3
CB5A	0.01	792.067	389.63	152.4	44857.5	1.13855	13.16
CB5A	0.01	192.927	46.99	13.12	4731.58	0.0576277	2.67
CB5B	0.01	836.542	379.45	147.69	51836.4	1.9001	15.68
CB5B	0.01	687.714	396.19	161.38	87282.9	1.17941	14
CB5B	0.01	773.888	335.19	137.87	50414.7	1.12299	18.96
CB5B	0.01	756.614	325.17	151.43	45817.9	1.39476	12.55
CB5B	0.01	556.338	284.42	126.93	57829.2	0.694002	11.52
A17-067-104-1A_MTX - 4	10		6.42	3.07	767973		0.52
A17-067-104-1A_MTX - 3	10		67.01	16.31	707693		1.35
A17-067-104-1A_MTX - 2	10		41.57	17.26	702426		1.47
A17-067-104-1B_MTX - 1	10		317.52	73.23	5347.06		6.45
A17-067-104-1B_MTX - 4	10		774.89	291.01	5229.9		19.22
A17-067-104-1B_MTX - 3	10		448.35	183.1	2686.99		27.65
A17-067-104-1B_MTX - 2	10		134.28	34.38	2516.79		3.7
302-4A-27-1/126	53	648.317	345.18	98.33	157474	1.1171	23.71
302-4A-27-1/126	53	465.956	365.53	92.59	131834	1.87244	17.6
302-4A-27-1/146	53	317.957	413.71	104.89	91522.3	1.5192	18.28
302-4A-27-1/146	53	8706.29	365.93	89.65	127878	1.08658	13.08
302-4A-27-1/146	53	894.362	475.97	121.52	92752.2	1.40835	14.13
302-4A-27-1/146	53	281.386	478.61	138.57	76413.4	1.67979	14.72
302-4A-27-1/126	53	479.284	335.41	90.4	160553	1.14961	17.17
302-4A-27-1/126	53	508.942	396.08	102.97	74198.9	1.46851	15.25
302-4A-27-1/146	53	383.538	472.44	130.57	45899.2	1.79057	13.48
302-4A-27-1/126	53	340.363	234.77	60.91	213377	0.961776	7.81
Thylacine-1-2194.5m	91	416.667	223.22	175.02	22496.9	2.66154	3.77
Thylacine-1-2194.5m	91	1259.43	283.81	172.39	119160	6.64247	6.17
TAA01-2460.1m	91	431.517	130.89	67	19370.1	1.59895	2.77
Thylacine-1-2194.5m	91	770.849	244.48	184.71	36117.5	7.87853	6.98
Thylacine-1-2194.5m	91	699.995	240.76	142.09	72440.6	2.41442	4.86
TAA01-2460.1m	91	92.1677	132.94	64.41	17299	1.47257	2.13
TAA01-2460.1m	91	236.614	152.55	83.16	18620.4	1.55621	1.9
TAA01-2460.1m	91	188.366	212.14	102.86	50957.7	1.3097	2.58
TAA01-2460.1m	91	258.595	149.16	82.31	24944.8	1.14863	1.26
TAA01-2460.1m	91	340.644	153.73	81.57	20452.1	2.02972	1.89
TAA01-2460.1m	91	138.422	167.31	80.77	13099.4	3.83075	3.58
Thylacine-1-2194.5m	91	954.776	288.67	150.34	152954	2.7933	3.68
Thylacine-1-2194.5m	91	797.059	262.14	131.21	138058	1.88731	3.42
Thylacine-1-2194.5m	91	1141.87	217.41	140.96	64392.5	4.2547	4.44
TAA01-2460.1m	91	228.614	197.51	100.69	13705.9	9.7303	3.41
TAA01-2460.1m	91	264.148	261.73	116.28	19175.7	13.7346	2.13
TAA01-2460.1m	91	261.032	141.63	86.96	11627.6	2.89166	2.71
CRI-IB	125	491.604	134.38	130.01	28303.8	18.3492	3.29
CRI-IB	125	510.192	123.52	115.02	27851.3	7.7836	2.66
CRI-IB	125	505.376	128.72	124.05	29573.1	18.1853	2.91
CRI-IB	125	561.398	143.45	122.22	39614.2	6.92931	2.97
CRI-IB	125	598.578	131.09	127.72	26814.9	18.1394	3.84
CRI-IB	125	554.882	135.97	128.49	31601.9	17.8357	3.9
CRI-IB	125	495.902	130.14	115.24	17027.4	19.3949	3.3
CRI-IB	125	487.157	122.87	113.91	24397.5	13.8795	2.96
Yodel-2 2950.4	160	26.9465	23.21	15.22	1440.98	0.270243	1.1
Yodel-2 2950.4	160	209.891	105.91	189.73	8929	3.40014	6.75
Yodel-2 2950.4	160	182.061	97.51	89.72	7353.17	3.2405	6.36
Yodel-2 2950.4	160	168.092	116.89	113.5	10137.5	3.3169	4.38
Yodel-2 2950.4	160	356.824	355.58	262.27	15997.1	15.4227	22.36
Yodel-2 2950.4	160	272.153	123.13	110.24	9987.88	3.51147	5.56
Yodel-2 2950.4	160	26.9465	57.08	45.88	4850.55	1.01601	1.08
North Ranhin 5 2847.25	168	585.644	163.79	126.97	9517.71	1.65756	3.27
North Ranhin 5 2847.25	168	700.668	186.9	125.45	8291.62	2.6464	4.41
North Ranhin 5 2847.25	168	693.187	155.48	106.81	7388.88	2.46553	3.68
North Ranhin 5 2847.25	168	651.794	187.2	137.78	9163.98	2.73263	4.68
North Ranhin 5 2847.25	168	989.625	204.73	136.08	10362.4	3.733	5.26
North Ranhin 5 2847.25	168	873.344	217.75	149.62	10717.1	3.08701	5.66
North Ranhin 5 2847.25	168	868.253	217.13	170.34	10744.6	3.14216	5.17
North Ranhin 5 2847.25	168	672.483	178.92	131.55	11646.1	3.99765	6.35
North Ranhin 5 2847.25	168	860.122	229.83	159.04	11064.9	3.3763	5.85
North Ranhin 5 2847.25	168	948.567	202.21	143.94	13322.4	2.98033	5.98
North Rankin 2845.3	210	576.426	270.36	195.87	14772.9	4.10263	5.18
North Rankin 2845.3	210	454.945	248.28	163.45	13501.9	4.31325	3.8
North Rankin 2845.3	210	415.739	241.25	156.64	12795.7	2.89247	3.84
North Rankin 2845.3	210	420.157	237.74	157.23	11276.1	3.10922	3.16
North Rankin 2845.3	210	329.733	177.89	113.82	7225.09	2.84934	5.55
North Rankin 2845.3	210	457.137	258.07	168.3	12452.5	4.38699	4.74
North Rankin 2845.3	210	491.073	249.02	175.98	17014.4	3.6461	4
North Rankin 2845.3	210	467.94	237.04	163.97	11482.2	4.26422	4.38
3793.8-12	250	313.41	246.27	53.16	110879	0.955236	3.74
3793.8-12	250	1883.43	180.09	51.91	79606.2	0.874666	5.58
3793.8-12	250	494.168	425.44	81.31	113986	1.57743	4.83
3793.8-12	250	352.206	243.92	70.95	150750	1.04826	3.87
3793.8-12	250	263.108	359.83	92.38	139127	2.33326	6.26
3793.8-12	250	356.947	252.54	54.23	93182.2	1.47393	5.26
3793.8-12	250	2887.69	360.6	81.92	155864	1.46623	4.86
3793.8-12	250	459.449	358.75	86.39	140220	1.42875	4.93
3793.8-12	250	242.536	176.82	41.95	64240.9	0.87221	4.2
3793.8-12	250	1043.99	371.74	96.03	102306	4.82941	6.38
3799.2-18	250.2	611.504	275.08	57.65	166977	1.1858	4.34
3799.2-18	250.2	421.834	310.03	62.86	113356	1.58938	5.01
3799.2-18	250.2	309.351	320.98	65.36	110874	1.56324	3.72
3799.2-18	250.2	699.066	300.28	65.66	109788	1.49326	3.77
3799.2-18	250.2	274.814	336.2	67.55	114415	1.27881	3.3
3799.2-18	250.2	273.145	347.92	70.09	106889	1.63268	4.03
3799.2-18	250.2	333.103	307.52	64.44	126400	1.81105	4.01
3799.2-18	250.2	392.775	346.66	73.07	73525.9	1.93586	5.37
3799.2-18	250.2	574.32	287.34	57.94	153695	1.42624	3.55
3799.2-18	250.2	426.541	279.74	61.37	129428	1.75958	4.64
3818.1-33	252	260.908	263.03	72.68	38548.3	2.02477	2.39
3818.1-33	252	180.389	316.99	72.58	32923.7	2.13959	2.63
3818.1-33	252	301.02	235.34	60.86	29305.2	1.32775	1.57
3818.1-33	252	216.95	372.2	92.74	22287.2	3.70957	2.4
3818.1-33	252	615.632	238.17	62.55	73657.7	2.56771	1.91
3818.1-33	252	1130.78	258.67	75.39	27803.9	1.9683	3.15
3818.1-33	252	232.463	339.73	86.74	37044.8	2.68753	1.71
3818.1-33	252	688.309	359.89	80.78	28360.3	1.57039	1.74
3827.4-37	252.2	330.557	306.82	97.64	56218.7	1.00054	1.82
3827.4-37	252.2	641.022	255.65	86.47	49928.1	2.07551	1.94
3827.4-37	252.2	1356.7	396.85	101.02	34633.1	1.29166	1.63
3827.4-37	252.2	740.812	269.25	91.11	31644.6	1.30273	1.67
3827.4-37	252.2	122.666	210.18	66.05	132422	1.23323	1.3
3827.4-37	252.2	2214.26	374.5	142.04	85913	1.6813	1.84
3827.4-37	252.2	4585.24	389.3	136.28	108872	1.0236	2.05
3827.4-37	252.2	806.961	286.15	103.1	34397.3	2.57846	2.06
3827.4-37	252.2	771.402	212.22	78.57	26092.8	1.18175	1.43
3827.4-37	252.2	686.831	252.32	85.46	47382.9	0.7945	0.97
TUN263	274	90.0642	174.02	88	28389	0.372018	0.78
TUN263	274	121.804	100.08	54.96	29095.8	1.54954	1.89
TUN263	274	76.2103	78.7	36.12	80816.7	0.551351	0.88
TUN263	274	89.5987	137.69	63.78	32399.8	0.966576	1.35
TUN263	274	213.059	569.34	287.78	43237.8	0.155354	0.48
TUN263	274	54.7357	97.05	44.77	18493.8	0.612726	0.67
TUN263	274	66.0289	98.09	45.69	29664.8	1.06447	1.33
TUN263	274	69.3629	94.29	44.94	18242.7	1.40678	1.77
TUN263	274	80.9296	41.54	24.93	13111.8	0.383061	0.4
TUN296	278	85.4846	76.46	29	13786.1	1.22048	0.81
TUN296	278	96.3107	79.86	29.55	14326.5	1.4507	0.96
TUN296	278	58.1504	103.35	39.64	134501	1.24337	0.91
TUN296	278	97.3017	64.82	22.8	9455.12	0.902646	0.72
TUN296	278	97.2977	76.21	25.68	67926.9	0.791765	0.8
TUN296	278	206.985	85.59	28.22	14292.6	1.81524	2.31
TUN296	278	63.0323	76.1	26.76	15292.1	1.6411	1.05
TUN296	278	115.479	86.01	32.83	18171.8	1.01426	1.5
TUN327	282	224.107	104.23	30.73	23476.2	0.577026	1.35
TUN327	282	87.9824	112.27	36.31	19488.8	0.616319	1.11
TUN327	282	130.692	105.64	31.47	14674.8	0.574115	1.04
TUN327	282	137.979	102.79	33.72	12723.4	0.876232	1.18
TUN327	282	170.741	118.11	42.91	20564.8	0.884486	2.17
TUN327	282	142.011	91.18	28.34	17054.2	0.68454	0.82
TUN327	282	147.476	108.65	35.37	17419.4	1.6848	1.26
TUN327	282	105.227	106.24	34.14	20398.7	0.572552	1.15
TUN363	284	795.062	202.39	71.67	34879	2.71368	3.48
TUN363	284	707.854	221.77	75.58	37978.5	3.01621	4.35
TUN363	284	21100.5	148.7	53.15	75798.4	2.17281	4.5
TUN363	284	24348	159.71	48.3	60875.2	2.40152	7.96
TUN363	284	624.812	214.13	74.89	43320.1	3.28114	4.18
TUN363	284	879.242	219.94	78.36	33536.9	3.50268	4.41
TUN363	284	1098.24	201.99	70.59	55216.3	3.48557	3.95
TUN363	284	781.376	160.98	56.27	69549.6	1.92233	2.85
TUN418.4	288	102.286	104.61	43.25	23147.3	1.6141	1.87
TUN418.4	288	570.178	109.04	42.04	32935.7	0.947649	4.09
TUN418.4	288	120.229	91.89	36.83	19024.8	3.06043	1.59
TUN418.4	288	2132.67	101.81	41.32	29785.2	2.14845	15.96
TUN418.4	288	138.062	102.89	46.81	20935.1	1.36967	1.61
TUN418.4	288	218.727	108.84	44.2	44706.1	2.81759	2.64
TUN418.4	288	270.481	115.08	51.17	30718.8	1.86907	14.02
TUN418.4	288	831.69	119.54	55.12	23192.9	1.76884	2.3
TUN554.3	291	170.585	95.45	71.18	28145	1.34494	2.24
TUN554.3	291	805.488	117.2	87.77	33652.7	1.83496	1.88
TUN554.3	291	140.47	112.7	67.17	40053.6	3.54991	2.09
TUN554.3	291	240.345	110.63	79.98	34853.2	1.49235	2
TUN554.3	291	223.936	133.97	98.23	51144.7	3.07619	2.5
TUN554.3	291	146.855	117.63	91.45	41761.3	2.29365	1.79
TUN554.3	291	132.792	105.04	72.07	37779.1	1.85305	1.96
TUN554.3	291	994.476	113.12	77.14	39828.1	1.36445	1.97
TUN608.2	292	850.496	168.63	93.42	43639.7	5.39942	68.79
TUN608.2	292	415.662	158.65	94.42	40663	3.07962	1.75
TUN608.2	292	490.123	162.54	97.18	35083.5	2.59963	1.94
TUN608.2	292	482.451	171.9	103.11	40265.4	2.48453	1.92
TUN608.2	292	392.445	165.18	95.27	38401.5	2.14741	1.89
TUN628.2	292	854.762	207.96	113.28	46440.9	2.45744	2.42
TUN628.2	292	361.043	215.43	104.83	37848.3	2.92634	2.26
TUN628.2	292	403.566	206.94	99.86	42292.4	2.22678	5.26
TUN628.2	292	455.764	208.13	102.71	41521.8	1.95613	3
TUN628.2	292	412.702	197.89	104.39	38059.5	2.5485	2.19
TUN628.2	292	313.19	194.35	93.54	32635.9	2.72863	1.99
TUN608.2	292	834.668	177.52	105.81	43222.1	2.72972	2.06
TUN608.2	292	599.007	168.98	104.09	43987.4	2.43143	2.59
TUN608.2	292	1285.57	160.06	109.61	43261.5	2.24765	2.32
TUN628.2	292	449.219	171.98	89.2	30593.6	2.20126	2.13
TUN628.2	292	425.197	185.06	89.69	39132.8	2.39557	2.28
TUN642.1	292.5	6843.48	258.08	119.04	54071.2	3.67279	2.73
TUN642.1	292.5	6447.77	211.39	106.39	54290.2	2.18388	2.81
TUN642.1	292.5	6780.78	267.36	122.92	64385.4	2.77318	3.01
TUN642.1	292.5	11152.2	244.8	114.23	46160.6	5.52163	4.17
TUN642.1	292.5	6564.12	234.9	108.34	87604.1	3.76283	3.49
TUN642.1	292.5	6957.25	256.5	120.34	53325.5	2.90815	4.32
TUN642.1	292.5	7418.41	241.44	115.17	59603.7	2.5012	3.35
TUN642.1	292.5	7719.76	248.5	109.33	64014.9	2.66738	4.29
TUN696.4	293	2535.1	300.9	85.04	40463.9	2.31038	2.48
TUN696.4	293	260.682	222.67	75.13	30284	3.15534	1.54
TUN696.4	293	259.146	361.51	98.57	44274.6	3.74911	2.05
TUN696.4	293	315.896	334.94	95.55	40362	3.03913	7.4
TUN696.4	293	231.865	286.28	87.3	37061.3	2.10761	1.54
TUN696.4	293	227.126	292.63	83.58	36415	4.81014	2.32
TUN696.4	293	280.699	321.58	95.69	42122.3	3.13068	2.04
TUN696.4	293	363.924	277.38	88.19	34521.7	3.44998	3.12
TUN746	293.5	300.353	129.79	85.95	46857.5	2.73708	1.74
TUN746	293.5	378.172	136.04	83.5	45367	2.41102	1.97
TUN746	293.5	654.864	143.96	84.16	58261.8	4.26909	3.85
TUN746	293.5	555.958	134.07	82.73	43738.9	3.26869	1.71
TUN746	293.5	392.07	148.01	91.31	49576.4	2.52765	1.83
TUN746	293.5	349.826	107.28	69.43	37897.4	2.2292	1.69
TUN746	293.5	396.835	149.24	99.9	44310.9	3.68609	2.05
TUN746	293.5	329.273	151.65	103.54	74048.6	2.5785	1.46
TUN799	294	371.505	144.18	108.26	44246.8	3.45474	2.21
TUN799	294	445.598	160.68	124.43	48654.9	2.94979	2.28
TUN799	294	312.71	144.03	101.12	42601.8	2.8616	1.99
TUN799	294	443.513	151.59	106.04	44890.7	3.10319	2.05
TUN799	294	408.386	146.03	109.75	42357.4	2.5156	2.54
TUN799	294	907.949	168.92	123.13	53125.5	3.67505	2.83
TUN799	294	520.127	159.35	123.68	52472	3.01874	2.2
TUN799	294	518.923	152.35	125.78	43937.1	2.78722	2.32
TUN849	296	197.976	297.42	108.19	41672.6	6.78699	3.15
TUN849	296	766.891	142.08	125.34	57057.8	2.32294	2.74
TUN849	296	438.394	122.87	100.79	42696.3	2.43352	3.83
TUN849	296	14.34	257.88	102.82	182987	0.21078	0.07
TUN849	296	238.619	100.2	93.34	36154.7	1.45858	1.57
TUN849	296	240.533	143.75	107.72	42171.3	2.08721	1.72
TUN849	296	336.329	107.06	85.7	31437.2	2.63431	2.26
TUN849	296	406.418	113.59	99.48	40412.3	2.78933	1.64
G9 Mecca Q	310	1462.78	1178.91	650.79	94720.9	1.43018	90.98
G9 Mecca Q	310	1236.92	1238.07	675.19	82335.1	1.18059	80.13
G9 Mecca Q	310	1768.19	1128.39	654.59	120712	0.803291	94.96
G9 Mecca Q	310	1722.65	1094.81	607.56	98761.6	1.02411	90.03
G9 Mecca Q	310	2140.23	1375.69	725.6	78829.5	1.27727	119.32
G9 Mecca Q	310	5209.66	1259.34	671.14	83596	2.6029	261.64
G9 Mecca Q	310	2317.47	913.11	502.69	140132	1.21591	84.01
G9 Mecca Q	310	1649.1	1211.61	705.18	114949	0.943459	100.66
G9 Mecca Q	310	1335.11	1369.92	728.62	85446.4	1.3136	68.26
G9 Mecca Q	310	1433.09	1443.69	730.36	75473.9	1.38642	69.92
JS 0582C	328	2521.51	2248.56	1608.98	20745.1	1.17143	16.68
JS 0582C	328	1763.72	2470.4	1798.31	18180.4	1.26226	15.26
JS 0582C	328	1630.11	1947.81	1580.83	26620.7	0.971844	14.92
JS 0582C	328	34377.3	2177.7	1400.02	16203.9	0.956414	74.88
JS 0582C	328	1722.14	2274.71	1720.35	31999.7	1.19738	16.54
JS 0582C	328	4347.45	2208.04	1670.4	23307.7	1.53646	20.51
JS 0582C	328	932.356	1896.3	1465.15	23217.6	0.920636	12.65
05AD6E	328	11374.5	5020.77	3342.7	23729.4	2.82214	53.02
05AD6E	328	12852.1	4265.68	2673.89	20123.5	2.0047	52.98
05AD6E	328	18220.7	4993.03	3052.4	25701.6	2.82124	65.11
05AD6E	328	23252	4164.71	2541.25	16279.4	1.80215	63.82
05AD6E	328	15792.2	5502.73	3210.78	39874	3.24973	71.57
05AD6E	328	20568.1	4755.62	2973.08	33308.2	2.31931	61.03
05AD6E	328	13653.2	5542.31	3188.06	23130	2.40321	62.52
05AD6E	328	21452.3	4945.76	2987.89	22386.8	2.40937	66.4
05AD6E	328	15577.8	4949.36	3109.46	25444	2.28856	66.18
05AD6E	328	12962.1	5337.09	3139.46	23905.2	3.0226	59.18
JS 0582C	328	2364.79	2450.83	2145.96	21119.8	1.25845	25
JS 0582C	328	9841.65	2398.92	1707.67	21522.4	1.2311	42.76
JS 0582C	328	3867.83	2408.05	1900.17	19453.1	1.04392	19.11
SCOT-1	331	155.766	225.71	101.85	43116.1	1.31269	11.88
SCOT-1	331	206.772	233.5	115.29	33188.6	1.2946	17.11
SCOT-1	331	133.287	214.03	108.29	43128.4	1.64404	13.8
SCOT-1	331	200.234	235.26	104.14	42624.2	1.06158	11.61
SCOT-1	331	134.342	235.2	112.14	33354.8	1.07028	11.93
SCOT-1	331	162.61	211.18	99.34	34491.2	1.44617	12.52
SCOT-1	331	232.159	225.78	121.13	48162.4	1.98046	15.62
SCOT-1	331	167.139	208.59	137.27	37540.7	2.40717	15.68
SCOT-1	331	170.229	211.84	108.62	37680.9	1.27793	16.12
SCOT-1	331	292.837	202.89	136.44	21450	1.62172	13.81
53710210	332	342.966	111.07	99.33	23430.3	2.15415	3.05
53710210A	332	584.421	155.17	131.39	57739.3	1.22873	5.85
53710210A	332	533.77	166.74	129.54	77340.6	1.15971	5.08
53710210	332	308.091	134.7	104.93	25666.5	1.76885	1.82
53710210	332	275.499	106.34	81.9	29010	1.59061	1.79
53710210	332	354.74	117.19	101.11	23936.3	1.75054	1.88
53710210A	332	470.597	144.69	128.4	32442.6	1.16025	4.91
53710210A	332	449.039	155.37	131.94	51618.4	1.1025	5.29
53710210A	332	605.202	172.14	143.85	60903.3	1.6084	7.8
53710210A	332	418.318	151.99	127.24	93983	1.55287	7.25
LA 5312B	332	26.6262	80.26	12.08	2971.72	0.0035	1.82
53710210A	332	568.646	154.73	137.58	63642.7	1.15212	4.9
53710210A	332	887.692	138.82	123.03	54171.2	0.93048	5.63
53710210	332	155.998	64.81	52.15	8939.29	1.56622	0.97
LA 5312B	332	63.1637	68.55	10.96	4752.22	0.45979	7.9
LA 5312B	332	13.253	56.26	7.21	3442.53	0.295484	4.23
LA 5312B	332	13.253	33.73	3.33	7773.65	0.0370027	0.99
53710210B	332	540.655	149.71	135.78	40116.1	1.16016	4.9
LA 5312B	332	13.253	66.17	6.99	4649.46	0.34777	1.46
LA 5312B	332	133.54	39.11	4.8	4642.23	0.441891	1.94
LA 5312B	332	13.253	41.8	5.67	905.25	0.0149802	3.13
LA 5312B	332	36.4185	44.66	5.05	1092.21	0.0399569	0.97
LA 5312B	332	13.253	116	13.96	4063.61	0.0776035	1.54
LA 5312B	332	13.253	35.07	4.93	4084.46	0.73566	1.51
53710210B	332	995.789	116.37	109.32	118393	1.2394	5
53710210B	332	614.08	139.27	134.42	50471	1.16548	5.45
53710210	332	333.832	145.84	119.97	22330.9	1.99467	2.74
53710210	332	503.149	38.76	31.55	6473.31	0.426364	0.54
53710210	332	440.305	173.34	137.28	25508	2.04857	2.31
53710210B	332	719.847	128.84	127.37	64721.3	1.05253	4.82
53710210B	332	417.985	157.91	138.12	44098.2	0.813711	4.35
53710210B	332	528.441	134.19	125.23	59530.5	0.920158	4.38
53710210B	332	948.937	133.34	128.1	56720.6	1.39415	5.35
53710210B	332	871.2	131.25	300.74	88023.8	1.75835	5.59
234	333	1388.11	1482.08	590.49	22399.4	0.651317	36.38
234	333	1105.15	2197.72	795.65	20940.5	0.71517	36.13
234	333	1008.45	1985.2	775.51	17859.6	0.845204	34.71
234	333	897.274	1535.39	577.83	29825.6	0.555468	28.88
234	333	667.759	1579.83	742.45	33685	0.585216	37.22
234	333	1069.62	1335.43	726.6	14806.1	0.676445	32.99
234	333	887.838	1807.61	938.44	19040.9	1.06302	36.46
234	333	1365.82	1525.73	884.19	17625.2	1.0099	51.42
234	333	722.561	1718.71	757.14	30072.4	0.666783	30.5
234	333	1106.15	1481.37	766.94	11884.1	0.83298	33.56
Y 3	340	293.622	263.68	154.17	100714	7.38	15.88
Y 3	340	292.016	73.02	36.29	11916	1.11854	2.87
Y 3	340	77.4196	109.3	63.38	73402.4	3.26378	3.87
Y 3	340	187.284	23.44	13.52	14822.2	0.162424	1.12
Y 3	340	16.7775	0.27	0.65	206.9	0.032185	0.04
Y 3	340	190.595	215.26	85.31	50424.5	23.8914	5.55
Y 3	340	16.7775	11.59	4.65	3345.26	0.338308	0.35
Y 3	340	16.7775	14.28	4.9	3931.74	0.11994	0.32
Y 3	340	101.96	10.16	3.33	2474.65	0.0382751	1.74
Y 3	340	1924.84	170.19	153.62	177771	6.92004	8.35
EUG CAR-002 3492.2	350	229.09	220.78	71.99	24867.8	1.08045	1.69
EUG CAR-002 3492.2	350	275.84	154.56	46.88	57981.7	0.951438	1.45
EUG CAR-002 3492.2	350	294.493	211.47	67.32	25621	1.6654	1.83
EUG CAR-002 3492.2	350	288.626	261.08	74.71	41951.4	1.19874	1.9
EUG CAR-002 3492.2	350	344.263	228.25	74.53	13073.3	1.09462	3.03
EUG CAR-002 3492.2	350	510.824	251.3	89.03	32140.7	2.06545	2.58
EUG CAR-002 3492.2	350	336.35	225.06	78.1	14483.7	1.4745	1.97
EUG CAR-002 3492.2	350	605.055	241.14	77.67	18112.6	1.31913	2.1
311-10006.4	356	202.484	481.87	66.72	64578.6	1.24527	37.87
E779929.11	356	269.188	150.03	103.75	29608.2	1.9447	57.8
311-10006.4	356	653.891	291.18	37.92	15900.6	0.955082	34.98
311-10006.4	356	182.997	425.39	45.85	21311.3	1.17802	49.33
E779929.11	356	18880.1	136.96	94.16	28102.7	1.88414	77.21
E779929.11	356	278.582	149.78	104.78	26281	1.77435	56.71
E779929.11	356	280.595	157.06	104.26	30884	1.86582	64.19
E779929.11	356	279.981	142.3	102.58	27001.6	1.71344	79.72
311-10006.4	356	252.253	543.46	77.61	48238.2	1.51464	40.72
311-10006.4	356	165.755	382.12	44.5	16683.2	1.08133	36.43
E779929.11	356	322.365	151.86	99.9	29202.6	1.60928	55.16
E779929.11	356	279.225	154.76	102.75	32203.5	1.98961	69.46
Y16	356	128.836	106.59	65.05	40242.9	2.86525	4.65
Y16	356	518.101	123.06	83.79	36662.2	4.33292	4.3
Y16	356	280.869	111.7	75.3	58749.5	2.68872	2.69
Y16	356	231.627	105.18	74.83	50812.4	2.62215	3.05
E779929.11	356	1179.62	132.22	94.98	25317	1.39126	96.26
Y16	356	352.359	104.11	76.05	34534.3	3.40867	3.93
311-10006.4	356	227.146	490.17	70.69	31459	1.03848	37.43
Y16	356	182.243	89.98	64.6	29374.2	2.7643	7.03
311-10006.4	356	126.223	383.69	42.75	15274.3	0.814781	40.59
311-10006.4	356	233.704	461.22	64.09	51942.1	1.14533	32.69
Y16	356	220.329	103.89	74.14	39650.5	4.38062	4.76
Y16	356	376.5	110.49	72.06	32941.4	2.85108	4.69
Y16	356	239.545	94.99	68.52	36160.7	3.14548	3.43
Y16	356	292.343	103	66.54	35529.7	3.19633	4.5
E79879.3	360	250.745	485.25	29.14	5922.51	0.679553	14.93
E79879.3	360	306.285	481.64	30.48	5338.6	0.449565	12.68
E79879.3	360	144.023	276.69	18.27	129658	0.233303	11.6
E79879.3	360	332.653	390.65	24.32	8546.89	0.436951	10.06
E79879.3	360	212.326	279.87	20.06	45139.7	0.290358	9.45
E79879.3	360	465.631	447.27	27.85	27869.1	0.386674	14.36
E79879.3	360	220.249	319.72	21.77	33712.4	0.40804	11.56
E79879.3	360	498.66	388.06	21.69	4313.97	0.359744	14.04
Y 23	365	616.236	113.98	63.59	46364.2	3.40204	5.06
Y 23	365	724.282	102.22	57.76	42135.9	3.57588	4.95
Y 23	365	666.118	118.53	68.04	41773.7	3.90721	4.8
Y 23	365	627.93	113.25	63.61	39590.2	3.64894	4.21
Y 23	365	651.392	112.11	70.37	44325.8	3.85853	4.24
Y 23	365	622.506	110.83	63.27	60156.2	4.10287	5.32
Y 23	365	594.991	108.99	61.93	42879.9	3.11529	4.2
Y 23	365	726.829	112.13	58.24	49537.5	3.55288	4.86
Y 23	365	678.736	116.9	65.13	44986.1	3.79337	5.19
Y 23	365	745.44	103.71	64.4	47185.3	3.22407	10.79
Yulleroo 1 14733	370	320.643	97.04	58.15	47735.5	3.6477	3.83
Yulleroo 1 14733	370	338.252	101.21	58.35	49759.8	3.32503	2.92
Yulleroo 1 14733	370	429.42	101.09	63.72	57194.7	3.31824	4.89
Yulleroo 1 14733	370	383.194	92.64	56.58	53822.6	2.91948	2.86
Yulleroo 1 14733	370	392.332	105.57	64.61	47266.6	4.06048	3.59
Yulleroo 1 14733	370	1342.32	97.41	60.28	76286.6	3.5237	4.55
Yulleroo 1 14733	370	372.097	106.58	63.61	48935.4	3.83003	3.58
Yulleroo 1 14733	370	819.244	87.3	52.73	49056.6	2.82182	3.43
Yulleroo 1 14733	370	312.444	98.08	60.15	55067.3	3.04956	2.95
Yulleroo 1 14733	370	359.593	106.93	64.32	53037.7	3.70089	3.64
TR-245.50B	379	151.132	264.21	19.17	97974.1	0.473833	2.49
TR-245.50B	379	1324.16	279.52	26.15	62607.5	0.441587	1.82
TR-245.50B	379	217.897	156.93	9.11	53775.4	0.216303	9.41
TR-245.50B	379	104.228	312.72	29.54	50137.5	0.730466	2.07
TR-245.50B	379	73.9704	108.04	3.49	87312.7	0.0818794	1.15
TR 231.00	380	70.7588	541.1	23.43	12288.9	0.419261	2.23
TR 231.00	380	61.2929	441.43	19.71	8570.01	0.211597	2.06
TR 231.00	380	83.4011	493.94	22.9	14146.7	0.414605	5.08
TR 231.00	380	43.1318	462.86	20.25	6939.49	0.351111	2.37
TR 231.00	380	13.253	476.56	17.41	6715.97	0.339932	1.74
TR 231.00	380	56.7133	458.24	23.89	13042.4	0.220964	2.99
TR 231.00	380	74.0505	502.37	28.08	16192.6	0.289627	2.38
TR 231.00	380	79.3292	430.83	15.96	6782.07	0.26023	1.86
TR 231.00	380	77.3646	496.75	26.19	13443.1	0.33327	2.61
TR 231.00	380	78.9404	467.47	23.71	9232.95	0.402378	2.76
TR 95.50	385	47.2063	830.72	85.64	3124.28	0.326195	2.78
TR 95.50	385	65.5061	1024.75	115.42	3726.31	0.521644	4.94
TR 95.50	385	45.5133	959.19	104.46	25446.1	0.378564	2.58
TR 95.50	385	68.3946	943.7	94.29	3563.99	0.547998	3.63
TR 95.50	385	40.9932	937.95	102.45	5223.46	0.410916	3.63
TR 95.50	385	40.0713	775.06	73.47	3153.88	0.507544	2.07
TR 95.50	385	48.1933	827.45	84.68	5133.19	0.616737	3.08
TR 95.50	385	76.064	959.11	109.61	8925.7	0.573172	3.46
TR 95.50	385	63.6244	940.12	95.95	11865.3	0.492333	3.17
TR 95.50	385	35.6188	824.06	80.9	14333.2	0.639604	3.55
TR 80.90	385.5	31.5497	681.2	67.71	14948.7	0.455333	1.9
TR 80.90	385.5	41.9554	715.31	78.96	18739.7	0.468568	1.85
TR 80.90	385.5	33.8685	819.89	93.43	2993	0.49805	2.67
TR 80.90	385.5	13.253	611.82	60.36	12651	0.397906	1.56
TR 80.90	385.5	13.253	783.15	88.42	10952	0.462265	1.78
TR 80.90	385.5	42.9852	708.08	72.26	3881.02	0.344186	1.92
TR 80.90	385.5	30.7532	729.84	76.38	2902.8	0.411037	1.76
TR 80.90	385.5	13.253	756.51	80.3	3533.73	0.364784	1.57
TR 80.90	385.5	30.2785	768.89	86.27	5277.77	0.454663	2.12
TR 80.90	385.5	31.6423	756.63	74.96	3626.51	0.460455	1.45
TR-27.25m	391	62.691	530.54	29.54	15031.7	0.411659	8.07
TR-27.25m	391	48.7759	504	24.43	4194.79	0.600571	5.07
TR-27.25m	391	76.3211	515.48	23.82	4509.25	0.295098	6.04
TR-27.25m	391	54.9004	482.69	23.58	4844.91	0.267275	6.37
TR-27.25m	391	60.3378	516.68	25.1	8669.95	0.332279	6.43
TR-3.20m	393	644.812	94.35	96.57	33065.8	1.1448	2.47
TR-3.20m	393	268.449	106.29	98.86	25389.7	1.1859	2.85
TR-3.20m	393	475.297	112.85	106.28	24601.1	1.65466	5.88
TR-3.20m	393	251.9	95.33	94.49	28716	0.979988	2.63
TR-3.20m	393	94.2365	108.78	105.65	22707	1.20503	2.7
CD12c 893.5	395	84675.4	25.78	25.2	15719.8	0.275587	21.3
CD12c 893.5	395	161914	29.69	29.92	2698.13	0.417558	42.84
CD12c 893.5	395	57.4791	332.16	301.7	11628.6	6.04772	13.97
CD12c 893.5	395	184.983	353.22	320.57	8547.84	5.89883	22.64
CD12c 893.5	395	106968	30.26	26.01	619.96	0.467758	35.6
CD12c 893.5	395	92826.7	19.81	29.72	6587.73	0.30103	21
CD12c 893.5	395	199.311	386.73	337.64	10120.9	7.78359	35.26
Scull-5	406	26.9465	147.87	55.27	47406.4	0.536307	3.81
Scull-5	406	26.9465	217.61	96.52	33745.9	1.51372	17.94
Scull-5	406	755.803	126.39	47.98	34683	0.570633	3.79
Scull-5	406	62.2427	158.38	76.47	36966.5	1.28265	6.52
Scull-5	406	66.6841	131.94	64.35	22904.5	0.559488	9.24
Scull-5	406	26.9465	178.61	96.33	15489.2	0.933208	7.39
Scull-5	406	75.7591	234.09	107.24	33813.3	0.909223	7.25
Scull-5	406	988.734	134.67	73.83	20689.9	0.646651	3.39
CD12c 906.3	410	128.964	147.16	136.54	8275.22	3.98224	11.27
CD12c 906.3	410	202.147	126.74	119.49	6821.45	4.13445	11.86
CD12c 906.3	410	258.851	134.73	132.47	14454.6	3.55216	13.07
CD12c 906.3	410	35.117	53.74	41.97	10672.4	1.75111	5.05
CD12c 906.3	410	164.152	99.48	95.61	12250.4	3.99532	8.76
CD12c 906.3	410	196.213	88.37	86.25	31029.2	3.07725	7.76
CD12c 906.3	410	86.4718	123.14	117.72	37156.4	3.56411	13.53
CD12c 906.3	410	45.0709	147.97	131.11	31600.3	3.34849	10
CD/2c 959.3	415	47.8397	93.05	10.89	3191.73	0.607874	7.79
CD/2c 959.3	415	2706.69	212.99	19.38	3609.08	1.42525	31.65
CD/2c 959.3	415	407.83	161.8	17.85	2469.88	1.31117	16.64
CD/2c 959.3	415	4286.1	144.62	15.21	2148.93	1.42965	41.33
CD/2c 959.3	415	160.632	272.19	36.25	8068.45	2.51033	21.9
CD/2c 959.3	415	92.749	94.93	8.94	1386.77	0.865523	7.49
CD/2c 959.3	415	116.187	311.01	41.15	10897.6	4.38818	43
CD/2c 959.3	415	225.449	143.85	16.1	2516.62	1.36455	13.49
CD/2c 959.3	415	269.219	136.75	19.26	2594.19	1.0176	12.27
BUT 208 10.35-10.40	432	546.446	117.82	86.13	88273.1	1.14097	3.23
BUT 208 10.35-10.40	432	167.731	143.67	96.87	34552.8	2.22112	3.7
BUT 208 10.35-10.40	432	417.305	145.16	99.92	56576.1	1.28213	2.88
BUT 208 10.35-10.40	432	206.903	160.08	104.39	48057.5	2.33143	3.26
BUT 208 10.35-10.40	432	391.043	135.61	94.43	46584.8	1.64983	2.93
BUT 208 10.35-10.40	432	228.154	149.61	99.24	37618	2.22124	4.1
BUT 208 10.35-10.40	432	775.777	143.58	94.72	61775.7	1.58683	2.77
BUT 208 10.35-10.40	432	198.86	133.11	99.22	34807	1.61905	3.32
BUT 208 10.35-10.40	432	467.119	132.51	91.65	49269.8	1.59312	3.13
BUT 208 10.35-10.40	432	252.311	161.42	110.21	36848.8	1.8605	3.24
RG-A9.0	441	88.4994	179.05	105.52	56631.2	2.44984	8.39
RG-A9.0	441	68.0515	170.05	102.18	39430	3.04043	4
RG-A9.0	441	55.1319	177.46	126.94	103648	1.99688	3.19
RG-A9.0	441	101.824	183.96	114.42	49766.9	2.28975	4.98
RG-A9.0	441	36.7848	172.51	101.94	38628.7	3.11644	2.42
RG-A9.0	441	1182.59	187.71	110.56	47182.4	2.82521	3.79
RG-A9.0	441	303.211	182.18	114.76	60013.4	2.89119	4
RG-A9.0	441	95.7484	181.39	99.79	40380.9	2.31469	3.33
RAY2	445	36.6731	117.03	53.99	36540.2	6.92853	1.36
RAY2	445	149.828	170.2	90.89	57301.8	1.87623	2.88
RAY2	445	404.7	191.44	109.69	76450.3	1.26325	2.44
RAY2	445	178.766	94	41.84	20584.2	0.923646	1.53
RAY2	445	46.9793	48.03	23.82	22442	0.0637066	0.73
RAY2	445	193.098	185.09	93.93	42210.8	1.51975	2.04
RAY2	445	198.061	192.58	108.67	54698.9	1.29327	1.31
RAY2	445	172.374	118.85	61.32	18688.2	1.14539	1.07
MAY-001-200.2m	455	262.092	33.06	31.3	10445.5	0.628708	1.03
MAY-001-200.2m	455	186.765	24.88	22.61	8519.34	0.649339	0.77
MAY-001-200.2m	455	222.714	54.73	53.08	18258.5	1.19364	2.16
MAY-001-200.2m	455	257.019	54.14	47.61	22749.9	1.11204	1.51
MAY-001-200.2m	455	78.5375	1.58	1.07	431.67	0.0140892	0.67
DLR7-48.7m	456	40.6744	2.72	2.7	1446.5	0.05122	0.47
DLR7-48.7m	456	21.5011	4.54	5.94	10746.9	0.0679253	0.63
DLR7-48.7m	456	32.1577	3.5	4.7	1962.31	0.0650299	0.48
DLR7-48.7m	456	54.6822	4	4.53	4099.15	0.1306	0.37
DLR7-48.7m	456	24.282	3.04	4.05	112555	0.060948	0.37
DLR7-48.7m	456	19.524	4.08	4.84	8635.85	0.0379889	0.27
DLR7-48.7m	456	69.8068	6.74	10.77	40732.5	0.146501	0.68
DLR7-48.7m	456	23.8995	6.89	6.37	14963	0.104703	0.19
MAY-001-406.8m	459	210.485	60.19	49.04	18503.1	3.91753	7.57
MAY-001-406.8m	459	45.3978	10.74	7.8	2617.59	0.155422	18.97
MAY-001-406.8m	459	36.7898	4.03	1.03	1871.52	0.0419887	0.45
MAY-001-406.8m	459	27.6649	5.55	7.95	804.98	0.0540746	2.56
MAY-001-406.8m	459	187.964	70.58	55.97	14407.7	2.4602	9.38
NBD 171 544.4	470	58.3132	215.05	114.82	61962.5	2.69842	10.77
NBD 171 544.4	470	843.258	190.84	96.9	55544.6	0.998234	5.73
NBD 171 544.4	470	112.875	47.67	33.8	262211	1.15457	7.63
NBD 171 544.4	470	73.2911	45.49	25.96	13502.6	6.81423	4.8
NBD 171 544.4	470	90.7454	156.77	74.34	79984.6	0.983991	4.03
NBD 171 544.4	470	26.9465	117.83	59.49	38544.8	1.26486	6.33
NBD 171 544.4	470	26.9465	179.54	93.18	51538.2	2.27063	22.11
NBD 171 544.4	470	72.7173	146.92	70.45	40874.1	0.970382	2.84
AS-2-8/1/139	490	194.811	4069.75	171.77	60286.7	4.51891	684.04
AS-2-8/1/139	490	459.583	4359.11	174.15	51911.2	4.23944	417.67
AS-2-8/1/139	490	13.1785	141.46	3.6	804.3	0.087819	26.27
AS-2-8/1/139	490	13.1785	34.93	0.41	410.06	0.020831	2.57
AS-2-8/1/139	490	1098.31	5058.05	196.02	25765.2	3.88414	366.59
AS-2-8/1/139	490	6267.07	3745.02	112.48	20322.8	1.64119	318.11
AS-2-8/1/139	490	2894.1	3682.42	119.86	38749.5	1.79026	167.25
AS-2-8/1/139	490	3054.82	3730.54	143.63	34104	5.19932	465.32
79989	500	2011.9	118.41	91.59	38564.4	0.953182	2.17
79989	500	651.424	169.82	121.14	38564.4	3.31037	2.75
79989	500	715.351	157.47	138.81	38564.4	1.68229	4.49
79989	500	904.753	178.42	127.57	38564.4	1.81598	2.77
79989	500	759.928	132.22	101.25	38564.4	0.772201	1.54
79989	500	651.424	169.82	121.14	61172.3	3.31037	2.75
79989	500	1494.35	165.01	137.78	38564.4	2.0261	3.46
79989	500	869.446	150.47	104.61	38564.4	1.01282	1.74
79989	500	724.549	166.28	245.52	38564.4	2.84046	4.25
HR1	510	109825	1173.67	70.92	5720.66	0.977576	61.3
HR1	510	105977	1784.82	87.1	2115.13	0.910713	58.17
HR1	510	171010	582.05	8.66	155.62	0.43508	98.76
HR1	510	79417.5	1253.43	97.33	3923.35	0.758378	77.8
HR1	510	28947	2021.56	322.76	17042.8	2.65457	38.49
HR1	510	8610.53	1913.57	222.8	13994.9	3.22228	20.35
HR1	510	10182	1947.91	222.11	14552.7	2.5675	21.25
HR1	510	74907.9	1315.47	141.06	11932.7	1.82081	56.52
SHQ15	540	9.6575	39.16	18.88	1956.93	0.114632	0.84
SHQ15	540	20.6268	38.98	19.45	1546.37	0.169259	0.98
SHQ15	540	9.6575	19.53	8.31	243.29	0.0430324	0.49
SHQ15	540	9.6575	21.5	14.31	590.44	0.0285012	0.46
SHQ15	540	25.5543	26.22	13.17	551.37	0.197811	0.85
SHQ15	540	178.691	83.13	29.86	495.67	99.0122	1.85
SHQ15	540	37.8583	24.12	16.01	13299.4	0.5087	1.1
SHQ15	540	41.5081	103.7	47.39	8944.37	1.53268	2.98
HN-15	550	1119.78	1454.83	142.34	41731.1	1.73602	20.02
HN-15	550	924.393	1515.05	136.78	27054.9	2.11888	18.34
HN-15	550	863.159	1589.9	125.45	27815.3	1.44248	19.46
HN-15	550	549.066	1523.55	121.58	20127.8	2.53502	13.42
HN-15	550	704.851	1463.77	141.47	22956.6	2.32271	29.5
HN-15	550	708.519	1489.46	141.3	30790.3	1.78536	17.85
HN-15	550	2567.38	1467.11	147.79	15998.9	2.04282	35.5
HN-15	550	1742.41	1644.34	162.93	19029.9	1.61855	28.24
BH3-17.0	560	757.26	137.25	111.19	18561.8	2.36256	3.99
BH3-17.0	560	427.568	115.36	76.78	26437.7	1.43816	2.64
BH3-17.0	560	16.0735	1.07	0.37	1803.64	0.003	0.33
BH3-17.0	560	55.7984	3.14	3.07	1610.01	0.0242643	0.68
BH3-17.0	560	72.4553	3.26	2.91	1043.76	0.0656951	0.74
BH3-17.0	560	514.088	112.64	87.7	52409.5	2.15641	4.42
BH3-17.0	560	54.9193	4.02	4.29	1205.21	0.080343	0.51
BH3-17.0	560	323.287	120.18	93.88	26957.4	1.65981	3.59
BH3-17.0	560	818.587	138.43	110.42	13111.6	2.53472	7.15
BH3-17.0	560	59.0867	3.28	3.43	1330.35	0.0851091	0.46
M106 501	600	166.864	91.01	83.51	42881.3	0.79826	1.6
M106 501	600	599.188	95.47	94.16	43929.4	1.12403	1.99
M106 501	600	572.77	89.38	85.14	38655.7	4.23468	2.96
M106 501	600	153.646	77.36	72.25	29361.5	0.670921	1.63
M106 501	600	319.503	39.07	35.61	33649.3	0.270616	1.33
M106 501	600	154	77.36	72.25	29361.5	0.671	1.63
M106 501	600	573	89.38	85.14	38655.7	4.235	2.96
M106 501	600	565	97.98	96.22	22818.2	1.307	2.33
M106 501	600	320	39.07	35.61	33649.3	0.271	1.33
M106 501	600	512	98.12	103.18	39722.1	1.095	2.5
M106 501	600	167	91.01	83.51	42881.3	0.798	1.6
M106 501	600	565.453	97.98	96.22	22818.2	1.30743	2.33
M106 501	600	389.325	58.44	55.4	23730.2	0.656517	1.65
M106 501	600	512.01	98.12	103.18	39722.1	1.09521	2.5
M106 501	600	599	95.47	94.16	43929.4	1.124	1.99
M106 501	600	389	58.44	55.4	23730.2	0.657	1.65
M106.370	609	85.2773	79.64	76.18	38564.4	1.29279	2.37
M106.370	609	113.526	89.14	68.09	38564.4	1.83868	1.88
M106.370	609	83.9629	117.72	98.42	38564.4	1.76871	1.85
M106.370	609	54.3843	106.5	79.57	38564.4	1.68308	2.01
M106.370	609	196.144	91.65	69.12	38564.4	2.21581	2.12
M106.370	609	367.619	132.01	143.9	38564.4	2.3424	3.32
M106.370	609	90.6447	113.67	119.34	38564.4	2.88918	2.47
M106.233	618.5	8422.42	155.21	89.74	38564.4	2.43369	5.72
M106.233	618.5	2920.7	165.29	103.15	38564.4	2.73393	3.64
M106.233	618.5	1545.28	162.37	102.65	38564.4	2.17798	3.55
M106.233	618.5	1256.45	168.9	105.69	38564.4	2.84662	4.61
M106.233	618.5	7128.91	126.81	83.51	38564.4	1.8708	4.55
M106.233	618.5	7988.09	160.32	99.27	38564.4	2.12836	6.11
M106.233	618.5	3076.05	172.2	113.83	38564.4	2.82367	4.41
M106.233	618.5	24862.2	150.28	102.78	38564.4	2.72641	9.74
Blin2-1602	625	220.045	232.49	88.28	34896.2	1.2883	3.34
Blin2-1602	625	812.427	215.77	88.69	46059	1.64184	3.54
Blin2-1602	625	351.441	218.7	94.34	63241.3	2.56829	3.38
Blin2-1602	625	266.228	239.37	98.2	44287	2.77322	2.97
Blin2-1602	625	153.659	192.4	83.24	43504.7	0.953433	2.18
Blin2-1602	625	953.892	189.09	80.99	40154.2	1.82065	2.63
Blin2-1602	625	1255.28	231.24	86.07	33670.4	1.62171	5.58
Blin2-1602	625	90.3757	172.55	68.77	31099.5	1.58967	2.47
WALLARA-1@1173m	630	572.984	154.54	84.34	58498.1	2.42258	4.01
WALLARA-1@1173m	630	1260.83	224.45	98.21	60622.6	5.82728	3.76
WALLARA-1@1173m	630	263.094	142.21	75.46	45726.1	2.2174	2.82
WALLARA-1@1173m	630	790.093	183.55	87.77	49919.4	5.57408	4.5
WALLARA-1@1173m	630	474.087	183.15	120.6	42860.8	4.1423	3.85
Blin-2 1266	632	151.592	119.88	58.25	31421.5	0.978653	2.12
Blin-2 1266	632	393.011	115.45	67.85	31461.9	0.723002	1.35
Blin-2 1266	632	225.162	141.61	74.23	38661.7	3.06303	1.37
m106. 38.8	632	468.377	126.3	56.23	20816.4	6.05771	3.33
m106. 38.8	632	1256.09	156.24	76.49	35121.5	1.45792	4.39
Blin-2 1266	632	649.86	194.69	98.85	41046.8	1.63826	5.68
m106.38.8	632	751.62	156.8	73.26	36118.1	1.20124	2.84
m106. 38.8	632	1070.08	180.24	81.66	40053.7	1.39573	3.14
m106. 38.8	632	1159.35	139.36	66.05	39225.3	3.03481	4.11
m106. 38.8	632	983.54	162.59	80.6	34300.9	1.69863	4.27
m106. 38.8	632	1603.38	150.15	75.85	35019.5	1.83717	6.33
Blin-2 1266	632	5714.11	149.58	79.94	39846.5	3.74784	3.3
Blin-2 1266	632	1511.54	202.23	109.13	51725.9	2.16504	2.76
Blin-2 1266	632	646.261	197.45	105.87	55587.2	3.01931	3.68
m106. 38.8	632	1282.11	168.42	82.63	35464.9	2.04091	5.54
Blin-2 1266	632	1328.34	169.7	86.79	54641.6	1.3798	2.6
FOREST-1@287.2m	637	280.336	302.41	114.53	43895	0.547203	5.82
FOREST-1@287.2m	637	623.28	321.76	114.56	40984	1.36695	4.34
FOREST-1@287.2m	637	129.893	328.99	114.11	36462.5	0.628112	7.08
FOREST-1@287.2m	637	698.264	297.07	317.29	43978.6	0.862088	10.42
FOREST-1@287.2m	637	401.51	261.55	292.67	93840.6	1.00194	14.32
Forest 1@836 m	641	417.141	52.47	13.59	12608.7	0.763196	3.51
Forest 1@836 m	641	422.876	56.72	14.2	10050.9	0.966305	2.56
Forest 1@836 m	641	374.078	49.88	14.81	9832.71	0.604537	3.23
Forest 1@836 m	641	765.014	64.8	16.66	8285.71	0.690542	3.21
Forest 1@836 m	641	437.909	52.87	14.85	10996.7	0.921098	3.71
Forest 1@836 m	641	656.106	51.98	13.47	8059.04	1.16516	2.87
Forest 1@836 m	641	417.551	60.36	15.15	11870	1.87568	3.62
Forest 1@836 m	641	669.662	54.08	15.44	11392	0.851194	3.54
Blin2-1630	645	257.735	181.08	77.11	85527.8	2.3165	3.37
Blin2-1630	645	1195.2	187.39	86.81	41470.8	1.378	2.82
Blin2-1630	645	1754.86	205.1	88.38	32337.3	1.69003	4.14
Blin2-1630	645	71.1872	260.48	132.64	39857.8	0.983988	2.55
Blin2-1630	645	624.268	164.76	66.61	43125.9	1.09325	5.75
Blin2-1630	645	890.821	197.29	91.76	54029.9	2.41573	4.7
Blin2-1630	645	1573.65	207.84	95.5	40249.7	1.6818	5.22
Blin2-1630	645	104.52	189.98	84.16	21060.6	0.880299	2.84
BMRIL-6-10	657	422.242	155.05	77.4	38573.1	1.49296	3.26
BMRIL-6-10	657	708.282	156.41	88.74	58261.6	1.26195	2.98
BMRIL-6-10	657	7520.43	107.37	59.3	28487.6	1.08145	1.7
BMRIL-6-10	657	377.744	142.29	82.9	49065.1	1.25199	2.01
BMRIL-6-10	657	220.201	165.41	103.14	45527.2	10.582	16.98
BMRIL-6-10	657	694.011	157.23	77.4	33417.7	1.38691	4.17
BMRIL-6-10	657	14981.1	143.86	69.02	38336.3	1.56496	3.04
BMRIL-6-10	657	286.086	163.95	82.6	49995.1	1.47612	2.35
Blin2-1726	659	396.33	70.05	30.32	229608	1.28807	1.19
Blin2-1726	659	250.755	103.73	40.59	161138	1.39969	1.8
Blin2-1726	659	39.171	6.7	2.02	17092.1	0.103471	0.13
Blin2-1726	659	194.623	76.39	31.73	110312	1.23724	1.2
Blin2-1726	659	209.258	76.47	36.37	235530	1.786	1.08
Blin2-1726	659	426.323	96.19	43.84	70266.4	0.996433	1.56
Blin2-1726	659	368.317	90.88	43.14	173838	2.38943	2.98
Blin2-1726	659	107.233	80.17	34.06	103842	1.4088	1.49
ZQ 127 250.6m	700	564.136	404.65	258.41	86764.2	6.05064	6.95
ZQ 127 250.6m	700	617.369	353.51	172.82	25423.1	11.182	2.51
ZQ 127 250.6m	700	414.389	285.18	250.28	21102.5	5.23798	5.36
ZQ 127 250.6m	700	198.661	400.81	266.07	25473.2	5.71322	5.78
ZQ 127 250.6m	700	370.981	319.14	218.74	26218.2	7.0451	7.44
ZQ 127 250.6m	700	279.948	464.71	396.83	24062.8	11.9788	12.96
ZQ 127 250.6m	700	819.515	379.57	278.53	19621.9	7.74388	8.97
ZQ 127 250.6m	700	310.871	348.31	286.86	44869.9	5.59411	8.16
ZQ 127 250.6m	700	26.9465	214.85	83.99	134897	1.9634	0.43
RCBLA-2002.2	715	670.224	183.6	97.12	39784.5	1.07866	2.17
RCBLA-2002.2	715	13.1785	242.74	91.79	60775.5	0.0574906	0.26
RCBIA 275.8	715	16.0735	54.08	37.99	14839.1	0.403392	0.22
RCBLA-2002.2	715	13.1785	49.22	18.57	10678.7	0.318858	0.66
RCBLA-2002.2	715	190.7	96.22	45.11	20756.4	0.465049	1.5
RCBLA-2002.2	715	272.614	92.08	46.39	18756	0.453056	1.28
RCBIA 275.8	715	3940.65	93.91	68.49	59444.7	1.05299	212.86
RCBIA 275.8	715	3449.07	113.26	73.7	39166.1	1.28145	0.76
RCBIA 275.8	715	16.0735	123.26	89.57	12497	1.36273	0.83
RCBIA 275.8	715	68.9094	99.59	68.88	72720.2	1.19765	0.62
RCBIA 275.8	715	968.732	85.23	63	27055.4	0.659041	0.49
RCBIA 275.8	715	2980.45	97.05	70.68	45303.5	0.737006	0.91
RCBLA-2002.2	715	125.022	359.17	134.9	49044.5	14.1541	1.74
RCBLA-2002.2	715	104.281	366.43	147.07	88685.6	0.28429	0.35
RCBLA-2002.2	715	2472.97	305.91	161.67	73239.2	0.259116	0.66
RCBIA 275.8	715	991.08	177.99	106.26	74586.4	3.68447	1.15
RCBIA 275.8	715	1372.52	84.24	60.44	15080	0.909595	1.43
RCBIA 275.8	715	16.0735	33.73	24.93	30944.1	0.259491	1.24
EMPRESS-1A 588.6-588.7	760	227.712	30.35	6.14	20355.6	0.040737	0.14
EMPRESS-1A 588.6-588.7	760	528.993	66.5	25.91	34798	0.355145	0.66
EMPRESS-1A 588.6-588.7	760	443.941	76.82	45.48	43005.8	1.58226	1.84
EMPRESS-1A 588.6-588.7	760	255.408	35.78	8.41	21030	0.12678	0.25
EMPRESS-1A 588.6-588.7	760	306.742	91.93	40.28	50942.9	0.353626	0.47
SKLL-2	790	17.3475	6.23	8.72	4564.99	0.0604113	0.16
SKLL-2	790	460.506	93.03	86.23	10518.8	1.85644	2.3
SKLL-2	790	10739.4	14.25	11.89	78300.5	0.86502	4.63
SKLL-2	790	114.493	49.49	46.81	10661.6	1.99184	2.03
SKLL-2	790	17.3475	78.65	35.73	17426.5	0.341705	0.89
SKLL-2	790	17.3475	8.98	33.95	1831.26	0.006	0.01
SKLL-2	790	161.813	97.12	107.53	16291.5	3.45094	4.74
SKLL-2	790	5141.08	8.69	4.91	57061	0.0565473	4.02
GA 2198 193.9-194.0	830	1465.18	123.88	53.85	38564.4	1.47342	3.23
GA 2198 193.9-194.0	830	5696.39	92.48	43.67	38564.4	1.39949	2.36
GA 2198 193.9-194.0	830	202.721	114.28	47.04	38564.4	0.723872	1.94
GA 2198 193.9-194.0	830	306.389	107.47	46.07	38564.4	0.887161	3.06
GA 2198 193.9-194.0	830	245.773	178.89	84.18	38564.4	3.8579	4.52
GA 2198 193.9-194.0	830	171.925	132.3	53.02	137016	1.05327	1.98
GA 2198 193.9-194.0	830	199.55	137.41	59.99	38564.4	1.35828	2.56
GA 2198 193.9-194.0	830	643.715	83.58	35.23	38564.4	0.859915	1.58
M103.44.2	845	282.37	156.38	92.25	38564.4	3.41912	3.42
M103.44.2	845	242.784	154.45	91.16	38564.4	4.06501	3.2
M103.44.2	845	277.887	164.4	100.18	38564.4	3.79582	3.25
M103.44.2	845	249.275	134.9	87.46	38564.4	3.9075	3.09
M103.44.2	845	262.978	157.88	98.98	38564.4	3.44459	2.91
M103.44.2	845	289.488	164.69	96.36	38564.4	3.80181	3.41
M103.44.2	845	190.009	126.83	81.35	38564.4	2.66105	3.54
M103.44.2	845	278.658	160.44	102.6	38564.4	3.52754	3.32
9/3 3.4	860	290.265	109.15	48.85	28235.8	1.35361	3.05
9/3 3.4	860	453.513	93.95	45.01	28884	1.41017	2.54
9/3 3.4	860	769.651	135.98	58.34	25615.4	1.46517	2.89
9/3 3.4	860	583.581	129.76	61.32	28051.2	1.60261	3.28
9/3 3.4	860	295.901	150.49	66.62	29498.9	1.69913	4.35
9/3 3.4	860	477.206	124.78	60.67	28936.6	1.30168	3.1
9/3 3.4	860	1134	157.35	77.98	29447.5	1.80513	4.15
9/3 3.4	860	1531.89	134.03	59.2	30516.2	1.74383	2.88
m?2	980	1021.6	169.63	108.3	34355.3	2.85597	2.67
m?2	980	170.713	156.01	108.53	25722.5	3.03356	2.73
m?2	980	286.909	161.94	120.26	28107.3	8.65633	2.52
m?2	980	226.189	127.5	85.3	15193.7	3.42975	3.24
m?2	980	82.6952	90.69	54.77	51840.3	0.987747	1.32
m?2	980	382.975	170.88	111.83	21176.8	3.1021	3.27
m?2	980	272.263	154.68	114.91	30265.9	2.98801	2.17
m?2	980	977.507	159.68	103.24	35537.7	3.04531	3.05
MDDH7-24	1039	998.76	277.66	73.2	66501.8	3.14186	3.3
MDDH7-24	1039	161.888	380.45	44.05	228242	0.661966	0.63
MDDH7-24	1039	1347.35	234.57	42.57	108206	1.60583	3.62
MDDH7-24	1039	1800.34	235.56	87.34	71497.9	2.73801	2.78
MDDH7-24	1039	915.525	240.68	90.65	74183.6	5.21869	3.41
MDDH7-24	1039	644.412	240.11	45.87	118644	1.83199	3.14
MDDH7-24	1039	827.447	281.96	72.27	51674.3	60.6371	3.86
MDDH7-24	1039	680.052	252.02	98.69	85126.8	3.72731	3.13
MDDH7-9	1045	881.063	369.53	68.07	58335.1	1.50184	4.25
MDDH7-9	1045	404.797	265.18	44.42	43000	0.833444	3.43
MDDH7-9	1045	498.738	362.26	72.95	59177.3	1.10443	1.82
MDDH7-9	1045	291.811	305.52	53.45	64680.1	1.55467	3.6
MDDH7-9	1045	376.546	351.09	80.72	40836	1.17175	3.04
MDDH7-9	1045	615.035	386.42	80.88	103181	1.73158	41.05
MDDH7-9	1045	825.262	304.1	67.6	54396.6	1.35059	2.55
MDDH7-9	1045	652.564	327.1	58.64	58571.9	5.00028	9.63
MDDH7-9	1045	130.541	212.63	49.26	49019.3	0.481483	1.4
MDDH7-9	1045	1061.66	375.19	86.09	60728.5	1.92745	11.13
AJ15/3v	1210	216.885	95.53	48.99	22331.5	4.3328	4.07
AJ15/3v	1210	194.402	93.94	48.15	15132.8	3.22453	4.12
AJ15/3v	1210	196.773	95.1	44.19	21354.8	3.43991	3.69
AJ15/3v	1210	187.319	87.1	39.38	33987.3	2.99824	3.69
AJ15/3v	1210	248.719	92.05	53.96	16082.1	2.90984	3.74
AJ15/3v	1210	200.895	89.96	43.65	27440.2	2.96436	4.49
AJ15/3v Amjhore	1210	229.612	100.53	43.68	17590.3	3.45599	7.47
AJ15/3v	1210	217.429	94.33	47.9	38094.8	2.92288	4.08
157358	1258	145.185	280.79	72.87	7276.59	1.00226	1.93
157358	1258	9.6575	303.9	85.26	6661.33	1.7998	8.72
157358	1258	159.664	307.12	87.66	11289.1	1.37377	2.95
157358	1258	48.1499	351.91	110.73	7703.49	1.27353	4.92
157358	1258	145.854	301.82	80.34	5741.38	0.933465	1.44
157358	1258	28.8846	340.19	84.95	6427.72	1.05176	2.49
157358	1258	9.6575	196.39	45.87	3884.13	0.494184	1.24
157358	1258	57.1294	253.83	67.32	4762.58	0.753133	2.68
157395	1260	1319.06	108.22	42.22	38008.1	3.15114	6.55
157395	1260	677.535	88.79	33.37	58096.1	1.18453	4.81
157395	1260	612.325	133.67	55.71	57472.1	2.1687	4.71
Duck Bay-1@144m	1260	67.9851	88.23	59.15	33465.7	4.56041	2.07
Duck Bay-1@144m	1260	229.305	91.51	75.25	29341.1	2.56031	5.83
157395	1260	924.914	100.07	46.98	48776.4	2.08908	7.33
Duck Bay-1@144m	1260	69.7333	94.82	81.47	37772.3	2.39357	2.21
Duck Bay-1@144m	1260	83.7357	88.04	76.11	34473.8	2.73784	3.69
157395	1260	1199.6	90.22	31.92	28612	2.26342	5.96
157395	1260	829.898	122.63	43.37	35319.8	2.22635	7.5
157395	1260	431.676	94.95	38.24	53298.6	2.44912	4.82
Duck Bay-1@144m	1260	79.3498	95.46	86.73	49948.3	4.57184	4.9
157395	1260	642.453	105.17	38.13	51756.9	3.97129	5.63
Petr14	1330	17.3475	0.78	2	145.72	0.0322072	0.07
Petr14	1330	181.607	0.58	1.58	443.22	0.006	0.15
Petr14	1330	17.3475	0.29	0.35	174.9	0.0189685	0.06
Petr14	1330	860.124	28.23	28.29	1102.13	0.0303275	0.25
Petr14	1330	1412.7	25.29	28.12	1256.57	0.0991866	0.44
Petr14	1330	17.3475	1.83	0.83	220.59	0.006	0.04
Petr14	1330	118.356	0.54	0.76	347857	0.0134135	0.14
Petr14	1330	166.751	1.18	0.35	473.81	0.0500536	0.23
Urap105.7	1360	2287.75	119.68	58.08	38564.4	1.22051	2.49
Urap105.7	1360	1797.74	101.07	52.01	38564.4	2.20039	2.95
Urap161.8	1360	1071.26	133.88	59.87	10288.4	1.09142	7.55
Urap105.7	1360	2216.68	127.68	60.32	38564.4	1.50998	2.18
Urap105.7	1360	4226.78	99.55	49.19	38564.4	2.13042	2.11
Urap161.8	1360	1541.01	203.67	18.84	19332.5	1.03492	9.52
Urap161.8	1360	4557.5	295.19	26.72	18070.4	1.73089	38.64
Urap161.8	1360	766.842	213.24	16.28	15447.7	0.990978	8.97
Urap161.8	1360	5284.61	145.76	11.64	25394	0.928998	13.73
Urap161.8	1360	1743.94	215.46	21.56	11063.6	1.45613	11.01
Urap161.8	1360	1518.22	200.31	21.78	9311.43	1.6823	8.47
Urap105.7	1360	1513.01	82	39.09	38564.4	1.0349	1.4
Urap105.7	1360	2582.41	136.82	55.68	38564.4	1.3831	2.44
Urap105.7	1360	1319.41	109.88	53.95	38564.4	1.45828	1.99
Urap161.8	1360	6010.37	250.76	24.71	10237.2	1.39649	19.49
Urap161.8	1360	4628.76	251.51	23	13788.1	1.57499	15.01
Urap161.8	1360	1861.43	153.17	15.1	7607.89	1.25466	8.86
Urap216.9	1366	1840.46	296.13	44.52	38564.4	1.36694	5.84
Urap216.9	1366	5619.7	274.91	41.07	38564.4	2.13231	7.43
Urap216.9	1366	1860.55	262.5	46.17	38564.4	1.63687	5.55
Urap216.9	1366	3008.03	267.93	38.8	38564.4	2.02821	13.17
Urap216.9	1366	9955.2	259.98	38.53	38564.4	1.55635	6.53
Urap216.9	1366	3883.95	292.42	46.79	38564.4	1.73724	7.24
Urap216.9	1366	2049	292.24	50.85	38564.4	1.74914	6.21
Petr12	1400	294.705	153.88	122.25	35437.2	1.52341	2.27
Petr12	1400	260.361	155.72	86	130562	0.910097	1.64
Petr12	1400	154.889	155.33	108.6	90600.2	1.47847	2.3
Petr12	1400	433.514	140.62	75.1	137725	1.24655	2.03
Petr12	1400	181.78	157.31	88.37	104050	0.959878	1.63
Petr12	1400	210.627	131.3	89.04	118486	0.944763	1.76
Petr12	1400	130.032	144.19	97.47	28970.7	1.36614	2.94
Petr12	1400	591.422	137.2	75.27	172580	0.875404	1.77
URAPU 474.5	1440	459.301	172.62	61.97	39692.1	3.46671	6
URAPU 474.5	1440	375.215	108.26	40.68	37977.6	1.94249	2.08
URAPU 474.5	1440	467.083	171.23	73.47	32051.2	5.3317	6.75
URAPU 474.5	1440	397.027	150.82	62.76	82484.1	3.92609	6.29
URAPU 474.5	1440	466.94	157.29	61.27	55246.9	2.96942	5.22
URAPU 474.5	1440	400.438	151.5	58.84	37199.3	2.93673	5.93
URAPU 474.5	1440	326.555	166.52	66.11	39336.6	5.09844	6.15
URAPU 474.5	1440	374.961	163.03	61.86	49204.4	3.52458	6.14
KRUP_lg_mount	1550	119.78	22.65	10.74	3239.2	0.021844	1.11
KRUP_lg_mount	1550	87.7254	24.9	14.8	2971.51	0.0587738	1.26
KRUP_lg_mount	1550	2920.47	43.9	25.11	4528.19	0.299928	1.89
KRUP_lg_mount	1550	1020.43	22.92	14.81	3968.95	0.0340982	1.41
KRUP_lg_mount	1550	92.9829	18.42	6.46	3308.52	0.0194978	1.34
KRUP_lg_mount	1550	153.02	43.75	18.76	6424.4	0.220463	1.53
AB62-170.80	1620	19.0111	211.1	192.74	34814.1	8.49995	12.16
AB62-170.80	1620	139.99	200.83	192.87	36687.7	6.20722	14.47
AB62-170.80	1620	14.4215	211.1	192.74	38564.4	8.49995	12.16
AB62-170.80	1620	139.99	200.83	192.87	38564.4	6.20722	14.47
AB62-170.80	1620	14.4215	231.4	196.62	38564.4	6.82045	5.94
AB62-170.80	1620	73.1833	210.12	188.68	37965.8	7.3285	16.35
AB62-170.80	1620	45.3933	214.89	193.12	32324.6	10.5689	13.41
AB62-170.80	1620	38.0917	207.67	173.97	38564.4	14.3289	8.29
AB62-170.80	1620	73.1833	210.12	188.68	38564.4	7.3285	16.35
AB62-170.80	1620	25.3652	201.14	171.87	47500.8	4.85993	10.91
AB62-170.80	1620	38.0917	207.67	173.97	30532.4	14.3289	8.29
AB62-57.40	1620	63.5648	207.83	208.74	16652.5	7.99478	3.75
AB62-170.80	1620	27.6196	231.47	208.72	29721.5	9.31372	9.19
AB62-170.80	1620	15.8694	231.4	196.62	27251.1	6.82045	5.94
AB62-57.40	1620	288.638	206.4	205.02	17932.5	7.49791	10.39
AB62-57.40	1620	288.46	226.06	218.38	22555	6.46075	7.3
AB62-57.40	1620	111.099	218.43	228.21	16811.9	8.01319	4.54
AB62-170.80	1620	45.3933	214.89	193.12	38564.4	10.5689	13.41
AB62-170.80	1620	14.4215	231.47	208.72	38564.4	9.31372	9.19
AB62-170.80	1620	14.4215	201.14	171.87	38564.4	4.85993	10.91
AB62-57.40	1620	83.2605	209.36	208.27	16077.7	6.36413	4.36
AB62-57.40	1620	93.8036	213.3	209.97	16229.9	6.19426	4.09
AB62-57.40	1620	255.435	205.98	204.27	17584.6	10.1603	5.35
AB62-57.40	1620	63.7472	199.89	189.69	16497.3	7.97353	4.07
5mBx-81.90	1640	245.478	226.58	85.98	36197.7	2.8816	22.6
MBX-100.70	1640	416.218	170.08	55.12	30990.9	3.10193	19.83
MBX-100.70	1640	295.884	194.73	61.78	20644.7	3.65032	19.16
5mBx-81.90	1640	483.27	277.33	90.34	33162.9	5.57173	41.76
5mBx-81.90	1640	507.496	190.79	65.93	20723.9	3.09644	38.81
5mBx-81.90	1640	301.326	155.3	50.81	18049.8	3.10225	25.97
MBX-100.70	1640	187.033	144.33	51.65	12117.7	2.47068	23.88
MBX-100.70	1640	384.28	238.47	76.8	14864.7	4.23711	30.88
MBX-100.70	1640	251.754	212.9	69.24	35513.4	3.39788	21.68
MBX-100.70	1640	1220.34	169.42	52.19	36775.9	2.62635	24.85
MBX-100.70	1640	457.313	247.32	80.8	26825.2	3.97028	22.75
MBX-100.70	1640	390.999	308.68	103.52	16933.6	3.66089	23.19
5mBx-81.90	1640	375.007	139.56	44.39	44177.9	1.87647	19.03
mBx-86.80	1640	464.307	207.02	73.05	34221.3	3.69793	22.44
mBx-86.80	1640	621.423	175.2	57.7	26136	3.5121	22.76
IMBx-148.80	1640	125.034	209.07	14.4	43210.7	0.272519	1.71
mBx-86.80	1640	316.982	193.88	68.44	27704.7	3.56436	21.05
mBx-86.80	1640	326.687	144.87	51	26256.3	2.41902	22.67
mBx-86.80	1640	453.754	187.25	65.15	21202.6	2.96786	18.86
mBx-86.80	1640	515.474	106.07	40.09	66455.7	2.78863	9.48
mBx-86.80	1640	343.548	147.97	53.45	17966.1	3.03483	19.58
mBx-86.80	1640	246.185	160.42	51.04	31526.5	4.80246	15.14
IMBx-148.80	1640	91.011	132.28	16.56	21194.5	0.565505	4.73
5mBx-81.90	1640	260.836	194.15	61.14	35442.9	3.03519	31.37
IMBx-148.80	1640	3570.67	36.79	6.14	14752.5	0.483826	2.81
5mBx-81.90	1640	679.486	182.92	59.76	21765.3	2.97636	29.91
5mBx-81.90	1640	353.774	268.52	91.72	14863.1	4.68071	38.88
IMBx-148.80	1640	514.816	65.15	15.1	2524.36	0.623921	10.19
IMBx-148.80	1640	249.724	176.48	28.54	34520.8	1.2668	8.99
IMBx-148.80	1640	1010.59	35.35	6.78	5982.31	0.312132	4.53
IMBx-148.80	1640	130.412	151.7	23.48	5238.84	1.45888	10.72
IMBx-148.80	1640	158.591	44.42	5.87	8225.94	0.401292	6.91
Mt Young 74.3B	1730	1064.97	94.93	39.12	13347.9	7.108	17.57
Mt Young 74.3B	1730	132.831	105.57	42.31	26739.8	3.26982	22.1
Mt Young 62.2	1730	405.885	147.26	32.93	49668.6	0.981454	10.23
Mt Young 62.2	1730	2455.86	147.02	31.28	27743.1	0.846687	10.03
Mt Young 62.2	1730	69.5752	55.17	8.48	4040.98	0.264091	3.3
Mt Young 74.3B	1730	140.902	75.08	24.35	11751.7	1.80407	10.52
Mt Young 74.3B	1730	601.694	106.41	42.27	11628.3	4.43829	10.45
Mt Young 62.2	1730	305.632	40.94	4.51	26298.1	0.113116	2.54
Mt Young 62.2	1730	235.85	133.96	32.8	25815.7	3.12019	8.14
Mt Young 92.3	1730	356.482	74.52	33.36	32535.6	1.9418	5.31
Mt Young 92.3	1730	705.501	74.31	35.79	23393.1	2.88734	12.52
Mt Young 74.3B	1730	220.575	102.11	39.21	19701	3.78022	13.86
Mt Young 74.3B	1730	66.8481	84.71	29.1	7384.82	0.943594	10.69
Mt Young 92.3	1730	418.947	101.73	56.93	40657.1	2.05483	5.94
Mt Young 74.3B	1730	476.547	77.35	30.6	88096.7	1.4428	11.85
Mt Young 74.3B	1730	868.359	100.63	39	32478.1	2.05244	15.08
Mt Young 92.3	1730	655.541	82.45	41.32	26634.8	2.76637	8.92
Mt Young 62.2	1730	48.9434	42.34	6.88	1694.75	0.155876	3.61
Mt Young 62.2	1730	132.407	57.42	6.84	27304	0.124803	2.39
Mt Young 62.2	1730	1031.23	53.99	7.7	29418.8	0.59136	4.23
Mt Young 92.3	1730	203.134	35.69	15.85	28880.5	0.996475	2.92
Mt Young 92.3	1730	424.517	91.44	47.95	30995.2	2.92034	6.97
Mt Young 92.3	1730	845.225	86.39	41.41	25193.5	4.04227	10.79
Mt Young 92.3	1730	202.457	105.01	74.43	64869.5	1.05463	2.49
437-178.56	1840	395.088	313.2	77.5	102091	6.94298	10.67
437-166.9m	1840	396.134	218.63	68.66	61482.8	13.7986	17.6
437-166.9m	1840	87.962	171.33	51.93	47701.4	4.98163	3.99
437-178.56	1840	69.3019	339.51	76.82	103326	4.60475	4.65
437-197.7	1840	162.159	156.97	58.77	9515.57	1.16133	8.03
437-197.7	1840	1035.88	162.6	51.93	12559	1.8063	33.99
437-178.56	1840	187.383	433.5	119.69	128714	11.9705	9.8
437-197.7	1840	88.9473	103.72	42.36	33363.9	2.91037	2.95
437-178.56	1840	46.0872	337.87	78.34	99420.3	4.77946	8.81
437-197.7	1840	193.202	196.08	60.55	10722.9	0.93625	4.4
437-166.9m	1840	381.428	247.64	85.09	16967.5	6.49411	7.44
437-166.9m	1840	120.414	241.75	85.97	20889.4	14.0366	6.83
437-166.9m	1840	232.745	200.96	67.76	50122.3	7.83185	5.65
437-197.7	1840	154.171	148.92	53.49	15925.6	0.872556	6.02
437-178.56	1840	74.2033	349.11	83.42	98794.4	6.52447	11.5
P011003A	1850	105.564	126.24	106.89	56563.3	0.991966	4.1
P011003A	1850	93.8202	108.71	97.9	45789.2	0.745153	2.78
P011003A	1850	90.1016	89.29	61.34	38297.9	0.970359	2.3
P011003A	1850	145.551	145.89	137.14	63015.2	4.21891	18.63
P011003A	1850	59.5204	78.81	72.67	37226.2	1.55507	2.92
P011003A	1850	372.845	125.64	108.89	50214.8	1.15609	4.37
P011003A	1850	153.165	98.25	76.51	62533	0.491451	2.79
P011003A	1850	252.916	176.14	196.78	58505.8	1.45972	6.88
P011003A	1850	7279.95	75.35	59.67	27354.2	1.42671	3.48
P011003A	1850	2250.81	173.77	147.86	92310.9	2.893	8.8
GuNF1	1878	186.686	112.59	110.41	131388	0.353536	12.02
GuNF1	1878	584.887	193.14	173.85	132222	3.26767	15.94
GuNF1	1878	232.406	166.98	156.37	123369	0.350677	11
GuNF1	1878	253.371	135.38	140.64	143970	0.48799	7.86
GuNF1	1878	168.366	132.24	136.9	73553.3	1.24442	16.37
GuNF1	1878	247.042	195.25	189.06	75514.2	0.706319	12.77
GuNF1	1878	175.309	133.66	127.26	147545	0.229384	19.3
GuNF1	1878	168.606	119.3	106.58	238291	0.495244	12.34
DD82BC8@185m	1891	26.9465	97.44	44.28	30350.7	3.92755	3.15
DG DD 371 656.6	1891	388.074	127.28	31.06	40532.6	0.948638	2.33
DG DD 371 656.6	1891	718.682	424.69	113.39	58359.3	4.65195	6.6
DD82BC8@185m	1891	26.9465	76.48	37.78	20384.3	2.91264	2.04
DD82BC8@185m	1891	26.9465	70.9	35.81	16236.5	2.24926	1.37
DD82BC8@185m	1891	26.9465	97.6	46.35	29788.1	2.97906	6.47
DG DD 371 656.6	1891	332.932	196.65	53.92	92632.3	1.81697	3.31
DG DD 371 656.6	1891	108.893	154.99	26.36	49810.7	1.00872	2.02
DG DD 371 656.6	1891	128.877	252.02	61.02	55193.1	2.48	2.57
DG DD 371 656.6	1891	2105.6	349.05	78.91	73112.9	3.08777	4.99
DGDD137 144	1891	177.403	217.31	70.76	9599.38	2.13068	2.86
DG DD 371 656.6	1891	344.723	302.89	48.93	54079.5	2.4894	1.91
DG DD 371 656.6	1891	333.427	379.89	88.62	59592.2	3.0247	3.81
DD82BC8@185m	1891	26.9465	80.24	35.4	19794.4	2.92661	1.62
DGDD137 144	1891	136.812	267.21	76.8	10321.2	2.8701	3
DGDD137 144	1891	194.44	266.5	76.98	11422.2	2.85213	4.25
DGDD137 144	1891	359.287	331.51	91.48	13232.8	3.71934	2.74
DGDD371_360.3	1891	231.339	204.12	105.68	28175.6	3.99827	3.3
DGDD371_360.3	1891	175.59	153.55	91.16	24148.5	2.53323	2.76
DGDD137 144	1891	151.927	167.21	36.28	6905.24	1.55547	1.58
DGDD137 144	1891	73.0703	179.5	77.46	21883.1	2.62358	0.73
DGDD371_360.3	1891	217.673	145.24	88.49	20335.7	2.67306	2.31
DGDD137 144	1891	181.938	216.64	52.35	8682.47	2.03711	2.64
DGDD137 144	1891	218.316	402.15	110.21	39842.1	5.95993	4.7
DGDD371_360.3	1891	108.873	202.6	115.22	35607.2	3.45564	2.89
DGDD371_360.3	1891	294.892	137.95	75.77	21961.2	2.72213	2.07
DGDD371_360.3	1891	89.4458	158.29	91.18	31359.7	3.01029	3.42
DD82BC8@185m	1891	26.9465	58.99	24	20785.3	1.76813	1.46
DGDD371_360.3	1891	196.867	143.92	79.8	24938.1	2.46821	2.76
DGDD371_360.3	1891	92.3865	144.24	75.59	25085.9	2.90402	2.54
DGDD371_360.3	1891	127.757	183.08	94.56	30345.1	3.72594	2.67
DGDD371_360.3	1891	206.458	153.59	82.26	21584.5	2.65488	3.96
DD82BC8@185m	1891	26.9465	81.68	37.1	32628.6	2.49972	2.27
DD82BC8@185m	1891	26.9465	72.91	28.53	20703.2	2.45209	1.93
WC3_MTX - 1	1900		505.97	159.62	432289		5.45
WC7B_MTX - 2	1900		377.39	68.99	8651.23		4.87
WC7B_MTX - 3	1900		352.59	60.74	9637.5		25.77
WC7B_MTX - 4	1900		124.13	25.61	21414.2		10.81
WC7B_MTX - 1	1900		325.42	67.11	10497.8		7.56
WC3_MTX - 2	1900		20.27	6.7	252098		0.34
WC3_MTX - 3	1900		389.14	126.77	1469.12		0.52
WC3_MTX - 4	1900		246.06	81.46	371514		400.13
13TALV70_298-1_MTX - 3	1950		372.49	44.18	68917.2		0.84
13TALV70_298-1_MTX - 4	1950		770.78	70.01	6350.03		0.01
13TALV70_364-9_MTX - 1	1950		638.06	78.24	757.56		0.35
13TALV70_298-1_MTX - 2	1950		2058.65	222.51	3728.88		0.96
13TALV70_240-6_MTX - 3	1950		19.82	7.04	58185.3		1.71
13TALV70_240-6_MTX - 4	1950		20.58	4.74	50760.3		0.35
13TALV70_298-1_MTX - 1	1950		385.38	49.49	635.68		0.08
17TALV70_298-1B_MTX - 2	1950		6.23	0.45	612513		0.07
17TALV70_298-1B_MTX - 3	1950		396.59	49.41	39613.8		0.39
17TALV70_298-1B_MTX - 4	1950		330	90.66	177504		0.67
17TALV70_298-1B_MTX - 1	1950		734.45	350.59	139925		11.28
13TALV70_364-9_MTX - 2	1950		124.83	17.71	772.37		0.04
13TALV70_364-9_MTX - 3	1950		163.54	13.14	3690.17		0.01
13TALV70_364-9_MTX - 4	1950		92.69	21.3	16820.3		0.01
17TALV70_60-1_MTX - 1	1950		1084.52	146.89	194326		0.86
17TALV70_40-5_MTX - 4	1950		3564.21	447.57	172674		0.69
17TALV70_40-5_MTX - 3	1950		69.92	14.01	259078		0.71
17TALV70_60-1_MTX - 2	1950		627.54	62.66	90878.1		5.39
A17-067-104-1A_MTX - 1	1950		25.21	9.22	746671		0.49
17TALV70_60-1_MTX - 4	1950		394.6	50.2	15002.3		0.48
17TALV70_60-1_MTX - 3	1950		1027.59	260.24	68477		38.88
17TALV70_40-2_MTX - 2	1950		1950.01	602.55	26684.6		0.04
17TALV70_40-2_MTX - 1	1950		1086.25	275.88	175707		0.59
13TALV70_240-6_MTX - 1	1950		7	0.7	6565.18
17TALV70_40-2_MTX - 3	1950		1327.14	253.65	220966		0.26
17TALV70_40-5_MTX - 2	1950		11480	175.95	3484.62		0.25
17TALV70_40-5_MTX - 1	1950		10.63	2	103.98		0.07
17TALV70_40-2_MTX - 4	1950		1137.86	205.3	137011		0.13
052-TV-04-492.0 Matrix	1970	15.6944	1369.86	244.82	46665.9	0.989766	0.1
052-TV-04-492.0 Matrix	1970	6.988	1911.37	455.83	11774.1	9.78907	0.1
052-TV-04-492.0 Matrix	1970	6.988	953.27	290.66	106433	0.0625	0.1
052-TV-08-613.3 Matrix	1970	14.2942	698.56	189.96	13677.2	0.522978	0.1
052-TV-08-613.3 Matrix	1970	6.988	900.68	178.26	8011.72	2.13446	0.1
052-TV-08-613.3 Matrix	1970	6.988	904.45	187.4	4959.49	2.25709	0.1
052-TV-08-613.3 Matrix	1970	79.4866	1497.86	414.27	27400.7	0.474305	3.64
052-TV-04-492.0 Matrix	1970	6.988	1714.29	458.88	24824.5	0.513939	0.1
052-TV-04-492.0 Matrix	1970	20.736	1283.7	211.6	56264.8	0.668555	0.1
052-TV-04-492.0 Matrix	1970	6.988	1872.74	460.7	12063.6	0.0625	0.1
052-TV-04-492.0 Matrix	1970	6.988	1818.25	450.88	34966.9	0.0625	0.1
052-TV-08-613.3 Matrix	1970	6.988	1195.32	352.14	88761.1	0.199985	1.77
052-TV-08-613.3 Matrix	1970	6.988	1163.19	237.19	46577.2	2.07663	0.81
052-TV-04-492.0 Matrix	1970	6.988	1786.85	262.7	2679.37	0.749237	0.1
052-TV-08-613.3 Matrix	1970	607.055	1324.29	359.86	20205.7	0.965169	3.36
052-TV-08-613.3 Matrix	1970	344.609	816.54	167.46	200006	1.81284	0.42
052-TV-08-613.3 Matrix	1970	6.988	816.1	151.79	15435.9	1.8574	0.46
052-TV-08-613.3 Matrix	1970	21.6383	1114.86	214.01	17665	2.59484	0.1
052-TV-04-492.0 Matrix	1970	6.988	943.72	171.38	105740	3.56264	0.1
052-TV-04-492.0 Matrix	1970	160.681	1765.52	482.32	48509.8	12.881	0.1
m-1-13	2000	40.2125	289.96	113.43	41055	1.6389	7.91
m-1-13	2000	17.3475	2.46	0.83	388853	0.0151171	0.13
m-1-13	2000	17.3475	31.17	8.85	14963.6	0.006	0.08
m-1-13	2000	17.3475	111.46	35.77	119541	0.0238379	1.38
m-1-13	2000	17.3475	241.63	139.12	83325.3	0.0515592	3.03
m-1-13	2000	2230.89	1145.47	290.04	96217.6	0.500987	12.24
m-1-13	2000	48.0523	112.07	38.07	103364	0.0550747	4.08
m-1-13	2000	151.893	119.33	45.54	47611.7	0.0150302	2.83
ST02-010-121m-B	2130	6.988	308.41	160.52	12311	8.96716	0.29
ST02-010-121m-B	2130	102.732	214.57	231.27	2811.68	4.84732	1.85
ST02-010-121m-B	2130	14.993	61.87	84.18	402219	3.83913	1.89
ST02-010-121m-B	2130	295.874	89.12	93.72	1638.18	2.24684	1.68
ST02-010-121m-B	2130	41.9835	295.71	227.23	4663.87	10.8627	0.1
ST02-010-121m-B	2130	43.8377	133.55	154.22	1937.18	4.15232	1.85
ST02-010-121m-B	2130	20.4615	103.62	26.49	95295.4	3.79028	0.1
ST02-010-121m-B	2130	8420.58	123.2	152.34	3320.65	4.08764	1.73
ST02-010-121m-B	2130	73.4398	239.58	246.69	4518.04	21.1936	4.42
ST02-010-121m-B	2130	18741.6	108.02	83.93	3062.41	3.23598	0.1
ST05-002-B	2130	20.2144	70.48	52.96	2395.53	7.55367	0.63
ST05-002-B	2130	6.988	38.41	28.42	7553.04	17.3949	0.63
ST05-002-B	2130	22.7241	22.42	21	33192.6	5.66442	0.32
ST05-002-B	2130	6.988	67.26	61.47	93723.8	7.71955	0.43
ST05-002-B	2130	6.988	88	97.27	205396	4.09309	0.51
ST05-002-B	2130	14.7811	168.97	132.76	4235.31	26.6545	0.39
ST05-002-B	2130	6.988	68.62	77.35	1952.95	4.88924	0.1
ST05-002-B	2130	6.988	36.29	46.56	89166.7	2.18055	0.48
ST05-002-B	2130	15.794	166.35	153	4672.49	37.0774	3.06
THD001-719.9	2170	200.603	102.79	177.18	45775.8	1.48942	1.81
THD001-719.9	2170	27.116	39.22	37.58	23978	0.146731	0.1
THD001-719.9	2170	254.658	22.61	25.95	27554	0.0625	0.1
THD001-719.9	2170	6.988	24.71	14.49	67899.4	0.0625	0.74
THD001-719.9	2170	57.4141	40.64	31.53	26219.8	0.138114	0.1
THD001-859.4	2170	54.3815	91.79	72.52	56428.6	0.172857	2.23
THD001-859.4	2170	137.921	108.37	83.84	59579.4	0.253552	1.64
THD001-719.9	2170	370.077	80.89	111.31	23530.3	0.880681	1.46
THD001-719.9	2170	15.6101	45.86	41.94	30397	1.67493	0.8
THD001-594.3	2170	432.509	230.83	128.35	19614	1.64217	3.85
THD001-594.3	2170	470.424	215.4	111.65	21647.4	1.0631	4.36
THD001-594.3	2170	138.593	206.57	113.29	20437.7	1.04129	3.18
THD001-594.3	2170	902.494	253.36	131.67	21919.8	1.37076	6.19
THD001-594.3	2170	485.625	238.84	138.64	21974.6	1.34469	3.39
THD001-719.9	2170	25.7362	51.18	39.77	39545	0.184872	0.5
THD001-719.9	2170	29.4161	44.14	45.84	24508.3	0.0625	0.31
THD001-594.3	2170	412.456	232.38	132.03	25042.6	1.51147	9.19
THD001-719.9	2170	126.183	98.79	117.86	32601.3	0.564797	0.87
THD001-92.7	2170	22.9982	73.56	113.91	33593.1	1.13462	0.49
THD001-92.7	2170	52.7003	129.84	179.43	25767	0.50302	2.64
THD001-92.7	2170	27.2175	115.42	168.75	10073.7	0.727608	2.19
THD001-92.7	2170	53.2119	111.09	201.37	10540.2	0.375634	1.72
THD001-92.7	2170	57.905	128.1	196.96	10379	0.76135	8.32
THD001-92.7	2170	99.3169	113.13	158.87	7047.2	0.17285	1.54
THD001-92.7	2170	17.0832	120.59	161.06	13166.1	0.352678	1.28
THD001-92.7	2170	77.6951	105.62	147.02	7916.75	0.251722	3.43
THD001-92.7	2170	57.8924	111.79	152.41	21503.5	0.818876	1.04
THD001-859.4	2170	488.764	116.82	102.27	82494.1	0.192381	2.36
THD001-859.4	2170	130.076	128.22	105.57	81326.7	0.255321	4.16
THD001-859.4	2170	133.619	114.63	100.9	71701.5	0.198324	2.6
THD001-859.4	2170	1431.76	95.13	63.84	66902.5	0.17818	1.01
THD001-859.4	2170	173.093	122.61	112	84803.3	0.2425	4.1
THD001-859.4	2170	407	76.84	62.36	43406.3	0.263276	1.97
THD001-92.7	2170	45.3458	92.78	105.61	5732.37	0.551863	8.67
THD001-859.4	2170	1389.09	90.56	88.81	63278.4	0.255967	2.3
THD001-859.4	2170	205.023	78.8	94.24	69003.6	0.0625	1.83
THD001-594.3	2170	193.625	221.59	121.64	19475.8	1.1764	3.79
THD001-196	2170	52.8051	196.15	138.79	21926.2	10.7226	2.98
THD001-196	2170	68.5624	162.87	112.91	25275.1	2.55968	2.51
THD001-172	2170	69.476	109.06	164.02	27750.4	1.28855	5.27
THD001-172	2170	325.428	139.06	165.6	31641.8	0.502404	2.65
THD001-172	2170	106.106	116.47	166.33	32659.4	0.52388	3.33
THD001-196	2170	34.8904	208.13	157.62	33703.4	3.35606	3.57
THD001-196	2170	93.4522	187.55	155	13279.3	4.5049	4.07
THD001-196	2170	205.187	167.9	121.93	8679.74	5.51674	2.82
THD001-196	2170	49.5211	210.77	127.96	15133.4	2.54333	3.9
THD001-196	2170	372.62	187.77	136.67	18159.8	3.48582	4.22
THD001-172	2170	17.3475	138.88	167.69	34619.9	2.29849	2.11
THD001-144.5	2170	267.69	159.74	161.71	39104.4	1.64526	3.59
THD001-254.1	2170	136.619	183.66	122.66	19606.2	1.99669	3.53
THD001-144.5	2170	274.721	148.46	172.09	43127.3	2.30207	5.53
THD001-172	2170	46.1306	51.37	37.67	155910	0.0373148	0.27
THD001-172	2170	17.3475	126.92	130.39	22278.6	0.400386	1.14
THD001-172	2170	17.3475	49.96	93.29	299546	0.160776	1.01
THD001-172	2170	17.3475	97.07	104.07	137843	0.240934	1.22
THD001-254.1	2170	28.619	103.98	52.45	6812.11	0.570285	2.68
THD001-254.1	2170	48.5391	162.48	98.31	14192.8	1.87691	1.9
THD001-254.1	2170	38.0969	213.35	132.18	15538.9	1.81708	3.17
THD001-196	2170	30.1126	218.42	152.86	17073.4	4.9313	3.05
THD001-144.5	2170	164.127	95.54	92.7	23947.2	1.11715	2.8
THD001-144.5	2170	384.6	74.44	84.71	36125.2	1.71973	3.11
THD001-144.5	2170	243.642	134.45	132.62	43774.9	2.25112	4.29
THD001-254.1	2170	58.7425	199.1	130.78	22998.3	3.02087	1.81
THD001-254.1	2170	59.5694	210.06	113.88	21474	3.00669	3.87
THD001-144.5	2170	212.007	142.57	136.39	36954.8	1.97081	5.13
THD001-144.5	2170	313.053	117.51	109.31	34830.7	1.16696	3.09
THD001-144.5	2170	212.709	102.27	103.1	32504.2	0.948284	2.33
THD001-144.5	2170	196.207	199.73	201.24	56715.6	2.68947	5.35
THD001-144.5	2170	240.783	92.76	92.88	28272	1.23512	7.04
THD001-254.1	2170	114.052	205.17	133.76	17252.7	2.08546	3.58
THD001-329.5	2170	36.2869	82.62	101.49	14052.1	0.171077	0.41
THD001-329.5	2170	26.9791	123.09	122.43	33550.1	0.0625	0.75
THD001-329.5	2170	19.7315	41.46	68.88	8719.75	0.127744	0.1
THD001-196	2170	31.4833	238.74	198.84	19552.1	7.06855	4
THD001-329.5	2170	18.0165	166.66	254.93	62205.4	3.69315	15.35
THD001-254.1	2170	103.561	157.75	87.43	8403.54	1.66291	2.3
THD001-254.1	2170	50.7441	242.13	169.06	35655.1	2.04407	3.73
THD001-254.1	2170	28.1426	150.25	102.75	6970	2.1991	2.58
THD001-329.5	2170	145.443	116.42	108.75	53494.5	0.179448	2.96
THD001-329.5	2170	31.2452	52.23	59.37	17490.4	1.70187	1.04
THD001-446.2	2170	37.1651	175.36	187.25	36389.6	0.954274	1.31
THD001-446.2	2170	102.159	193.56	208.34	30107.4	0.729191	1.91
THD001-446.2	2170	843.513	155.75	184.45	41639.8	0.534226	4.51
THD001-483.6	2170	29.7077	162.55	189.06	41889.6	1.48903	4.7
THD001-483.6	2170	29.0068	249.73	264.8	41905.9	2.03951	2.33
THD001-446.2	2170	60.6966	150.02	155.79	25092.3	1.0296	2.11
THD001-446.2	2170	968.124	190.84	215.7	33805.9	0.622844	1.33
THD001-446.2	2170	69.6378	153.62	192.94	43564.1	1.05474	2.01
THD001-446.2	2170	6.988	150.86	166.69	16700	0.412934	2.31
THD001-446.2	2170	19.3625	181.73	253.83	6389.01	29.0545	4.65
THD001-446.2	2170	62.7807	172.5	223.14	36145.1	1.75144	2.78
THD001-483.6	2170	380.614	242.82	299.91	46034.6	6.03843	10.27
THD001-483.6	2170	15.0965	172.45	459.36	141123	2.01081	0.34
THD001-594.3	2170	664.856	247.89	134.43	24440.4	1.49345	5.96
THD001-594.3	2170	183.586	225.89	128.38	24052	1.61684	2.44
THD001-594.3	2170	358.957	271.42	149.75	23937.3	1.33524	4.7
THD001-483.6	2170	2342	154.72	180.33	26091.2	0.84987	1
THD001-483.6	2170	16.1226	147.54	173.45	35126.1	0.774501	0.83
THD001-483.6	2170	98.4346	245.61	338.89	59468.2	1.68915	2.25
THD001-483.6	2170	121.205	249.94	354.08	75065.2	2.67056	4.05
THD001-483.6	2170	20.5041	162.61	157.33	71007.4	0.567425	3.14
THD001-483.6	2170	15.4684	271.11	320.64	84303.7	1.02632	4.21
THD001-389.5	2170	164.452	217.65	628.42	96098	1.452	2.86
THD001-389.5	2170	19.4841	202.89	270.55	114314	0.633119	2.39
THD001-389.5	2170	262.366	219.13	243.77	67194.4	1.21454	3.78
THD001-329.5	2170	22.2247	32.91	41.88	15043.1	0.0625	0.25
THD001-329.5	2170	6.988	55.92	49.4	50820.1	0.0625	0.2
THD001-329.5	2170	32.5541	193.77	309.83	117751	2.89815	3.96
THD001-329.5	2170	47.1028	188.99	248.81	57367.2	1.86922	3.22
THD001-389.5	2170	6.988	13.96	32.36	8764.82	0.0625	0.1
THD001-389.5	2170	6.988	69.77	132.94	21367.6	0.0625	0.1
THD001-389.5	2170	28.3555	164.19	325.76	53677.5	0.0625	1.27
THD001-389.5	2170	25.0422	65.34	90.34	6436.76	1.31271	1.17
THD001-389.5	2170	28.1887	218.09	346.53	74287	1.90475	2.97
THD001-389.5	2170	45.0747	187.15	313.52	77468.2	0.423971	2.96
THD001-389.5	2170	27.0706	168.95	343.59	104158	1.2503	0.82
PEC2B_MTX - 3	2300		289.29	198.41	43893.8		4.05
PEC2B_MTX - 4	2300		71.12	5.89	5249.58		0.01
PEC2B_MTX - 1	2300		275.43	160.77	42562.8		2.52
PEC2B_MTX - 2	2300		279.45	195.59	43326		6.73
ABDP-9 132.78	2504	208.044	53.56	51.68	155704	2.3146	2.69
ABDP-9 132.78	2504	454.478	55.55	76.61	162930	2.13652	2.26
ABDP-9 132.78	2504	251.342	49.21	48.66	150768	2.0206	2.46
ABDP-9 132.78	2504	122.216	58.67	46.76	212858	2.0343	2.2
ABDP-9 132.78	2504	180.285	56	48.61	203119	1.51249	1.95
ABDP-9 132.78	2504	193.312	44.37	36.44	214138	1.37924	1.91
ABDP-9 132.78	2504	266.218	40.34	49.09	299170	2.97987	1.95
ABDP-9 132.78	2504	456.838	52.83	59.81	226154	3.20933	2.07
ABDP-9 366.61-366.87	2561	300.797	91.43	111.69	42995.2	2.18065	2.82
ABDP-9 366.61-366.87	2561	625.712	103.96	123.12	69464.6	2.22841	2.57
ABDP-9 366.61-366.87	2561	841.153	94.2	141.07	42335.1	5.7106	5.23
ABDP-9 366.61-366.87	2561	264.181	92.06	118.79	56281.9	4.03886	2.46
ABDP-9 366.61-366.87	2561	327.301	94.24	135.75	38345.8	3.20294	2.77
ABDP-9 366.61-366.87	2561	61.2052	113.28	189.77	61566.3	3.07761	3.27
ABDP-9 366.61-366.87	2561	26.9465	100.13	137.08	45171	5.30835	2.96
ABDP-9 366.61-366.87	2561	86.7892	101.68	146.29	42068.8	3.20382	3.06
GKP201-637.72	2563	194.893	167.69	469.3	16013.5	1.75919	1.22
GKP201-637.72	2563	268.907	163.06	463.22	24619.9	1.5286	1.93
GKP201-637.72	2563	202.72	160.48	462.14	18055.7	1.58422	1.17
GKP201-637.72	2563	167.357	160.91	445.91	18009.7	1.14854	1.43
GKP201-637.72	2563	109.309	169.28	495.4	17555.7	2.03953	1.61
GKP201-637.72	2563	258.532	164.65	468.93	16428.4	1.07696	1.1
GKP201-637.72	2563	156.066	166.37	485.02	18011.3	1.73895	0.98
GKP201-637.72	2563	168.464	166.93	452.62	18132	2.15415	1.47
ABDP-9 427.48-427.64	2575	26.9465	95.6	76	27997.5	0.606435	1
ABDP-9 427.48-427.64	2575	26.9465	106.97	77.37	32410.1	0.533542	0.73
ABDP-9 427.48-427.64	2575	226.687	94.34	129.63	109612	1.69137	1.8
ABDP-9 427.48-427.64	2575	26.9465	97.91	117.8	73388.8	1.26447	1.08
ABDP-9 427.48-427.64	2575	157.813	115.42	192.08	25471	4.0908	4.75
ABDP-9 427.48-427.64	2575	407.975	131.59	244.48	22667.1	4.88401	6.08
ABDP-9 427.48-427.64	2575	26.9465	93.15	71.02	39203.5	0.420703	0.68
GSPm-9-A	2690	26.9465	144.64	51.08	141034	2.58342	1
GSPm-9-A	2690	26.9465	231.77	72.02	82799.7	7.31783	1.66
GSPm-9-A	2690	26.9465	205.94	83.52	200794	3.83006	1.15
GSPm-9-A	2690	26.9465	261.58	27.78	72573.9	1.87403	0.03
GSPm-9-A	2690	26.9465	29.74	3.51	132400	6.44001	0.34
GSPm-9-A	2690	26.9465	234.07	39.46	211215	4.02733	0.08
GSPm-9-A	2690	26.9465	52.41	6.42	182585	3.72185	0.04
GSPm-9-A	2690	26.9465	250.66	95.63	31929.6	2.84552	0.03
LRP 18	2694	39.06	29.28	21.61	38564.4	1.55059	1.05
LRP 18	2694	14.4215	11.68	8.3	38564.4	0.557596	0.46
LRP 18	2694	14.4215	33.08	31.46	38564.4	1.60599	1.15
LRP 18	2694	14.4215	25.56	21.66	38564.4	36.4114	0.95
LRP 18	2694	14.4215	20.79	16.05	38564.4	1.19636	1.68
LRP 18	2694	14.4215	40.24	31.81	38564.4	2.23443	1.32
LRP 18	2694	14.4215	21.9	15.04	38564.4	1.19992	0.2
LRP 18	2694	14.4215	41.67	36.61	38564.4	2.325	0.65
BAB 141r	2930	61.9646	184.78	620.34	62201.9	13.1736	1.88
BAB 141r	2930	874.425	216.47	676.45	80062.6	12.4844	9.22
BAB 141r	2930	14641.5	202.81	670.35	52484.5	0.918128	3.94
BAB 141r	2930	254.68	222.26	1092.99	85745	1.08387	0.87
BAB 141r	2930	26.9465	224.83	866.35	51110.1	1.13963	0.91
BAB 141r	2930	142.459	202.79	889.03	83935.8	8.05027	1.1
BAB 141r	2930	57.3942	220.45	1116.62	75634.8	1.72623	0.98
BAB 141r	2930	75.2904	208.23	735.42	66849.6	1.26162	1.28
BAB 1452	2945	9.6575	145.78	790.25	144674	0.584211	0.68
BAB 1452	2945	55.4622	169.02	571.85	143420	0.734003	0.75
BAB 1452	2945	9.6575	161.01	609.91	118056	0.930593	1.21
BAB 1452	2945	28.4688	166.92	565.86	136257	0.659584	0.98
BAB 1452	2945	9.6575	155.33	516.99	123044	1.02808	0.91
BAB 1452	2945	250.706	180.07	570.08	144282	1.03872	1.08
BAB 1452	2945	188.553	136.64	450.46	108196	0.701053	1.05
BAB 1452	2945	27.9297	160.33	567.65	125011	1.29264	0.65
BABI 3132	2970	93.1745	209.8	846	112316	4.22489	1.95
BABI 3132	2970	17.3475	182.92	650.92	98104.8	0.970347	2.62
BABI 3132	2970	17.3475	219.38	848.85	108258	6.51156	1.8
BABI 3132	2970	45.4725	196.37	798.99	104725	1.70051	1.86
BABI 3132	2970	43.1978	137.52	458.9	70792.2	2.59629	1.32
BABI 3132	2970	268.094	176.06	481.76	43183	13.4276	2.68
BABI 3132	2970	108.285	182.39	443.84	59875.4	0.680193	1.2
BABI 3132	2970	46.5123	174.37	445.93	70025.9	0.325988	0.27
DI-16	3195	44.3784	39.87	64.77	44194.5	0.413759	0.36
DI-16	3195	271.672	28.57	49.99	319217	0.61598	0.18
DI-16	3195	39.5333	34.51	91.63	246658	1.09607	0.92
DI-16	3195	28.2093	56.59	90.54	193058	0.256238	0.39
DI-16	3195	12.9875	47.92	80.84	320748	0.562271	0.15
DI-16	3195	997.888	66.41	84.87	185405	0.346407	0.81
DI-16	3195	200.782	13.52	21.06	243093	0.16925	0.08
DI-16	3195	155.159	41.16	52.95	158284	0.26585	0.25
SB-6	3250	112.832	425.53	506.47	157199	2.67332	2.54
SB-6	3250	76.9614	367.88	420.62	193062	0.762893	0.55
SB-6	3250	44.9794	391.45	519.82	95982	0.923281	1
SB-6	3250	71.4339	410.27	515.82	119888	1.20131	0.93
SB-6	3250	187.615	429.67	565.77	108693	0.949107	1.24
SB-6	3250	67.3735	388.83	469.67	93763.9	0.932181	2.27
SB-6	3250	35.9398	365.77	425.56	78312	0.55645	0.54
SB-6	3250	41.4586	369.12	458.4	174589	0.217393	0.61
ABDP8-7	3515	133.575	41.01	33.94	17885.2	4.07755	0.17
ABDP8-7	3515	67.3084	199.88	109.87	77388.1	1.92759	0.09
ABDP8-7	3515	58.4839	77.63	11.04	30425.8	0.811997	0.09
ABDP8-7	3515	17.3475	3.93	1.09	6823.57	0.006	0.01
ABDP8-7	3515	17.3475	81.56	41.37	31012.5	1.00641	0.02
ABDP8-7	3515	58.7358	5.53	2.78	5828.97	0.0995219	5.06
ABDP8-7	3515	17.3475	30.34	10.33	14821.6	0.189614	0.28
ABDP8-7	3515	36.7625	121.92	61.02	47218.4	2.07798	0.22
YTN03B_MTX - 4			31.52	27.21	425405		0.38
YTN03B_MTX - 3			170.68	143.97	4722.55		1.82
YTN03B_MTX - 2			73.85	38.25	2768.02		5.47
HS 036-2		16.0696	618.06	120.2	54331.6	3.79756	5.59
SCP255@100.7m		13.1785	54.19	37.47	22728.4	1.41542	0.97
SCP255@100.7m		13.1785	83.76	55.87	45959.7	2.36365	0.79
mDDAZ-22		676.631	286.82	58.51	49528.5	0.973715	3.34
Tasmanite mine		223.378	121.81	142	13194.3	0.964935	1.91
SCP255@100.7m		13.1785	69.98	54.04	47655.6	2.11539	0.36
Tasmanite mine		319.681	175.11	194.97	23840.5	1.07924	5.66
SCP255@100.7m		13.1785	62.9	43.82	34351.1	1.51523	0.47
SCP255@100.7m		13.1785	78.52	70.46	81997.6	1.64807	0.67
Tasmanite mine		860.432	221.74	266.57	45295.9	1.81359	4.34
mDDAZ-22		283.47	233.31	78.48	39767.5	1.03501	5.98
Tasmanite mine		267.382	198.26	227.75	20972.6	1.42768	2.27
Tasmanite mine		214.552	157.38	175.64	18488.5	0.982473	2.28
mDDAZ-22		73.6767	171.86	37.26	45356.2	0.483128	1.57
mDDAZ-22		358.748	268.25	44.54	20652.9	0.943038	3.02
mDDAZ-22		319.865	202.65	39.48	36684.7	1.16374	1.78
mDDAZ-22		368.531	157.61	36.03	69175.1	0.607846	2.28
Tasmanite mine		494.169	217.2	244.88	39289.6	2.20883	5.57
HS 036-2		14.2231	113.96	36.28	11598.4	0.386731	1.86
105.7		1319.41	109.88	53.95	38564.4	1.45828	1.99
HS 036-2		1247.02	610.33	166.91	50786.8	5.76876	9.96
HS 036-2		6.988	384.77	81.07	9138.6	8.94207	10.41
HS 036-2		6.988	499.43	118.21	25340.5	2.40904	6.72
HS 036-2		10315.7	154.02	33.77	2079.36	0.640481	11.93
105.7		1797.74	101.07	52.01	38564.4	2.20039	2.95
HS 036-2		240.664	263.19	62.18	26343.3	0.685496	1.38
Tasmanite mine		380.125	151.03	190.83	16546.5	2.25576	3.7
Tasmanite mine		288.116	172.95	195.03	21405.8	1.19463	26.26
Tasmanite mine		327.922	194.46	207.13	22648.1	1.05368	2.97
Tasmanite mine		200.811	147.5	165.37	23041.2	1.30013	3.12
HS 036-2		6.988	202	47.53	289864	12.5519	4.16
HS 036-2		18.4018	110.28	22.5	245887	2.49085	1.11
11 5KB6-3.8		4704.95	752.75	1738.48	15833.5	1.17917	28.37
HS 036-2		733.476	218.07	129.69	21338.4	1.27517	4.41
mDDAZ-22		215.082	175.35	37.63	48073.7	0.496536	2.31
mio 3.465.8		407.918	246.54	108.29	20558	2.92147	8.46
J.H.		15976.2	1394.96	2063.12	31458.9	0.804144	209.08
mio 3.465.8		462.527	219.94	99.81	23100.3	3.15136	7.93
mio 3.465.8		400.97	196.62	93.09	15549.5	2.72294	6.37
SCP255@100.7m		13.1785	83.71	52.39	38266.6	1.94754	0.27
SCP255@100.7m		13.1785	93	82.96	91293.3	4.30546	2.02
mio 3.465.8		807.875	244.92	113.6	26889.4	2.48987	7.81
mio 3.465.8		591.389	260.83	123.99	23253.5	3.31187	7.73
mio 3.465.8		364.841	221.43	102.55	16881	2.58969	6.29
J.H.		14524.1	2036.12	2869.2	41473.3	1.03336	174.33
J.H.		1919.75	2155.46	2855.39	39466.9	1.24076	63.93
J.H.		1409.22	2033.67	2858.45	69344	1.13865	55.5
J.H.		69220.4	1250.59	1884.43	20597.5	0.458265	596.7
SCP255@100.7m		27.5157	53.52	36.31	34052.1	1.44713	0.29
mDDAZ-22		153.492	290.34	63.86	85826.6	2.27048	3.13
J.H.		126819	403.9	602.01	6817.15	0.224801	846.38
J.H.		654.073	2469.58	3255.61	44531.4	1.06072	43.69
J.H.		791.117	2262.36	2765.39	48900.1	1.32706	46.62
J.H.		1877.16	2022.99	2634.18	55143.8	1.26869	50.67
mio 3.465.8		469.803	278.94	122.8	23674.1	3.78545	7.14
mio 3.465.8		399.695	258.64	113.14	18801.2	3.04879	6.88
11 5KB6-3.8		5723.56	731.31	1658.38	13236.2	1.04064	35.96
11 5KB6-3.8		8025.51	701.77	1363.42	16442.8	0.855071	32.98
J.H.		177065	73.37	30.09	763.11	0.054558	710.59
11 5KB6-3.8		5367.31	544.69	1135.02	9039.1	0.765926	25.58

## Sheet: G47890
Mukherjee, I., and Large, R.R., 2020, Co-evolution of trace elements and life in Precambrian oceans: The pyrite edition: Geology, v. 48, https://doi.org/10.1130/G47890.1
